1           **NREM consolidation and increased spindle counts improve age-related memory**  
2                           **impairments and hippocampal representations**

3 Robin K. Yuan<sup>1,2,3\*</sup>, Matthew R. Lopez<sup>4\*</sup>, Marc E. Normandin<sup>4</sup>, Arthur S. Thomas<sup>1^</sup>, Vanessa R.  
4 Cerda<sup>4</sup>, Amandine Grenier<sup>4</sup>, Matthew Wood<sup>4</sup>, Celia M. Gagliardi<sup>4</sup>, and Isabel A. Muzzio<sup>4#</sup>

5 <sup>1</sup> Department of Psychology, University of Pennsylvania, 425 S. University Ave., Philadelphia,  
6 PA 19104

7 <sup>2</sup> Division of Sleep and Circadian Disorders, Departments of Medicine and Neurology, Brigham  
8 and Women's Hospital, 221 Longwood Ave., Boston, MA 02115

9 <sup>3</sup> Division of Sleep Medicine, Harvard Medical School, Boston, 25 Shattuck St., MA 02115

10 <sup>4</sup> University of Texas at San Antonio, Biology Department, One UTSA Circle, San Antonio, TX  
11 7824

12  
13 <sup>^</sup> Current affiliation: University of Pennsylvania, Perelman School of Medicine, University of  
14 Pennsylvania, 3400 Civic Center Blvd., Philadelphia, PA 19104.

15 \*Authors contributed equally

16 #To whom correspondence should be addressed.

17 Isabel A. Muzzio

18 UTSA, Biology Department,

19 One UTSA Circle, San Antonio, TX 78249

20 Phone: 210-458-4810

21 Email: [Isabel.muzzio@utsa.edu](mailto:Isabel.muzzio@utsa.edu)

22  
23 **Abbreviated Title:** Sleep quality rescues age-related memory decline

24 **Number of pages:** 31 pages

25 **Number of Figures:** 7 (3 extended data Figures)

26 **Number of words in the abstract:** 225

27 **Number of words in the introduction:** 638

28 **Number of words in the discussion:** 1299

29  
30 **COI statement:** The authors do not have conflict of interests

31 **Acknowledgments:** This works has been funded by NSF (CAREER award 1256941 and  
32 NSF/IOS 1924732 to IAM), NIH (F31MH105161 to RKY and RISE GMO60655 to MRL). We  
33 thank Sriharshini Muthukumar for running some behavioral experiments, and Maria Garza and  
34 Juan Vasquez for helpful discussions about the manuscript. In particular, we thank Dr. David  
35 Uygun, Department of Psychiatry, VA Boston Healthcare System and Harvard Medical School,  
36 for providing his validated automated spindle detection code.

37 **Keywords:** NREM, spindles, place cells, sleep, aging, memory, remapping

38 **Abstract**

39 Age-related changes in sleep patterns have been linked to cognitive decline. Specifically, age is  
40 associated with increased fragmentation of sleep and wake cycles. Yet it remains unknown if  
41 improvements in sleep architecture can ameliorate cellular and cognitive deficits. We evaluated  
42 how changes in sleep architecture following sleep restriction affected hippocampal  
43 representations and memory in young and old mice. Following training in a hippocampus-  
44 dependent object/place recognition task, control animals were allowed to sleep normally, while  
45 experimental animals underwent 5 hr of sleep restriction (SR). Interestingly, old SR mice  
46 exhibited proper object/place memory, similarly to young control mice, whereas young SR and  
47 old control mice did not. Successful memory correlated with the presence of two hippocampal  
48 cell types: 1) “Context” cells, which remained stable throughout training and testing, and 2)  
49 “Object” cells, which shifted their preferred firing location when objects were introduced to the  
50 context and moved during testing. As expected, EEG analysis revealed more fragmented sleep  
51 and fewer initial spindles in old controls than young controls during the post-training sleep  
52 period. However, following the acute SR session old animals displayed more consolidate NREM  
53 and increased spindle count, while young mice did not significantly display changes in sleep  
54 architecture. These results indicate that consolidation of NREM sleep and increases in spindle  
55 numbers serve to ameliorate age-related memory deficits and allow hippocampal  
56 representations to adapt to changing environments.

57

58

59

60

61

62

63 **Significance Statement**

64 Age-related cognitive decline is associated with poor sleep quality. Interestingly, while sleep  
65 restriction has strong negative effects in young subjects, it does not affect or leads to  
66 performance improvements in old ones. This study investigated the possibility that sleep  
67 restriction differentially affected sleep architecture in young and old mice, leading to distinct  
68 cellular and cognitive phenotypes. In young animals, sleep restriction produced memory  
69 impairments and less flexible hippocampal representations, without significantly affecting sleep  
70 quality. However, in old animals, it led to improved sleep quality, enhanced memory, and more  
71 precise and flexible hippocampal representations. These findings have important implications  
72 because they indicate that the risk factors associated with poor sleep quality and age-related  
73 cognitive decline can be modifiable.

## 74 **Introduction**

75           Mounting evidence suggests that sleep plays a key role in memory consolidation (Abel  
76 et al., 2013; Rasch and Born, 2013; Stickgold and Walker, 2013; Tononi and Cirelli, 2014).  
77 Studies have shown performance gains following post-training sleep (Smith, 2001; Gais and  
78 Born, 2004a, b; Gais et al., 2006), as well as learning impairments when sleep restriction (SR) is  
79 conducted after training (Smith and Rose, 1996; Graves et al., 2003; Prince et al., 2014).  
80 However, the effects of SR appear to vary across the lifespan and are more complex than it  
81 appears. For example, partial SR has minimal effects on adolescent cognitive performance (de  
82 Bruin et al., 2017) and sleep loss can differentially impact adults (Krause et al., 2017), with  
83 some studies showing within- and across-individual differences in cognitive susceptibility  
84 (Saletin et al., 2016; Wilson et al., 2019). Interestingly, SR therapy, which is characterized by  
85 limiting sleep periods, has very positive effects on the sleep quality of old subjects (Wennberg et  
86 al., 2013), yet the underlying physiological and cellular changes associated with this  
87 improvement remain unclear.

88           Sleep involves intercalated periods of non-rapid eye movement (NREM), a state  
89 characterized by high amplitude, low frequency (0.2-4 Hz), synchronous  
90 electroencephalographic (EEG) activity, with periods of rapid eye movement (REM),  
91 characterized by low amplitude fast desynchronized EEG waves. It has been proposed that  
92 NREM is particularly important for memory formation and transfer of information to cortex (for a  
93 review see, (Antony et al., 2019), whereas REM has been associated with both consolidation of  
94 novel information and forgetting of previously encoded information (Poe, 2017). During NREM,  
95 there are rapid bursts of activity (10-14 Hz) of short duration, known as spindles. It is thought  
96 that spindles facilitate memory reactivation, which is essential for proper consolidation (Rasch  
97 and Born, 2013). Critically, changes in NREM and spindle characteristics predict early memory

98 impairments in older subjects (Taillard et al., 2019). However, it remains unknown if reversing  
99 spindle changes can have positive effects on cognition.

100         The hippocampus plays a critical role in the formation of episodic memories –  
101 recollections of events happening in specific contexts at particular times (Squire and Zola, 1998;  
102 Smith and Mizumori, 2006). The activity of hippocampal place cells, which fire in specific  
103 locations when animals navigate (O'Keefe and Dostrovsky, 1971), provides a cognitive map in  
104 which episodic memories are embedded (Mizumori, 2006; Smith and Mizumori, 2006).  
105 Evidence supporting this idea comes from the observation that networks of cells active during  
106 wake are reactivated during sleep at a compressed time scales during NREM (Lee and Wilson,  
107 2002; Drieu et al., 2018; Hwaun and Colgin, 2019), which has been shown to be important for  
108 goal-directed memories (de Lavilleon et al., 2015).

109         Both sleep and cognition have been shown to undergo age-related changes across the  
110 lifespan (Huang et al., 2002). Older humans exhibit more fragmented sleep and less slow wave  
111 sleep in comparison to young adults (Ohayon et al., 2004; Espiritu, 2008; Hasan et al., 2012).  
112 Additionally, older subjects exhibit impairments in hippocampus-dependent cognitive tasks  
113 (Miller and O'Callaghan, 2005; Lister and Barnes, 2009; Lester et al., 2017). These  
114 observations have suggested that age-related cognitive decline may be linked to changes in  
115 sleep patterns (Altena et al., 2010); however, the relationship between sleep quality and  
116 hippocampal activity during wake periods remains unclear. Here, we investigated if an acute  
117 period of SR could modify subsequent sleep architecture, hippocampal place cell firing, and  
118 object-place recognition (OPR) memory in young and old mice. Our results indicate that SR has  
119 differential effects in young and old mice. In young mice, an acute SR session does not  
120 significantly affect sleep architecture but it decreases the flexibility of hippocampal  
121 representations and memory. Conversely, in old animals, SR leads to NREM consolidation and

122 increases in spindle count, which allows the hippocampus to adapt to changing environments  
123 and reverses age-related memory deficits.

124

## 125 **Materials and Methods**

### 126 *Subjects*

127 Young (8-24 weeks old) and aged (54-72 weeks old) adult male C57BL/6 mice (Jackson  
128 Laboratory, Bar Harbor, ME) were housed individually on a 12-hour light/dark cycle and allowed  
129 access to food and water *ad libitum*. Animal living conditions were consistent with the standard  
130 required by the Association for Assessment and Accreditation of Laboratory Animal Care  
131 (AAALAC). All experiments were approved by the Institution of Animal Care and Use Committee  
132 of the University of Texas at San Antonio and were carried out in accordance with NIH  
133 guidelines.

134

### 135 *Surgery*

136 For sleep recordings, prefabricated 2 channel EEG/1 channel EMG headmounts  
137 (Pinnacle Technology) were implanted [from Bregma (in mm): frontal leads: AP: +3.2mm, ML:  
138  $\pm 1.2$ mm, and parietal leads: AP: -1.8mm, ML:  $\pm 1.2$ mm] and secured with cyanoacrylate and  
139 dental cement. Two EMG leads were placed under the nuchal musculature and affixed with  
140 VetBond. For place cell recordings, drivable 6-tetrode headstages were affixed to the skull with  
141 cyanoacrylate and dental cement, with recording electrodes placed directly above the dorsal  
142 hippocampus [from Bregma (in mm): AP, -1.7; ML, -1.6; from dura; DV, -1.0] (Wang et al., 2012;  
143 Wang et al., 2015)). Sleep patterns were not analyzed in mice implanted with tetrodes because  
144 the EMG lead made the tetrode implants unstable and noisy. Animals underwent at least one  
145 week of recovery prior to recordings.

146

### 147 *Sleep Restriction (SR)*

148 An automated SR cylindrical apparatus (Pinnacle Technology, Lawrence, KS) containing  
149 a bar spanning the enclosure was used for all SR procedures. Animals were individually housed  
150 in the apparatus starting at least 24 hours prior to the beginning of the experiments with fresh  
151 bedding, food, and water, and were returned to the apparatus in between trials. To induce SR,  
152 the bar was rotated continuously by a motor at approximately 3 rpm with random reversals in  
153 direction to prevent that animals sleep during brief periods by predicting the pattern of rotation.  
154 All SR procedures followed the object exposures and therefore, were started within 4 hr after  
155 the lights were on.

156

### 157 *Experimental Design and Statistical Analysis*

#### 158 *Behavioral Training*

159 For all animals, behavioral procedures (e.g., exposure to the objects on day 1 and  
160 memory testing on day 2) were conducted during the first 4 hr of the light cycle (ZT 0-4). The  
161 object/place recognition task (OPR) was conducted in a square context (30cm x 30cm) with  
162 visual features on each wall for orientation (Figure 1A). Everyday items (glass beer bottle, metal  
163 soda can, and plastic juice bottle) were used as objects after pilot testing determined mice  
164 showed roughly equal preference for all items on average. On day 1, animals were habituated  
165 to the empty context for a habituation trial (Hab). After the habituation, the 3 objects were  
166 arranged along one of the diagonal axes of the context and 3 object exploration trials (T1-3)  
167 were conducted. During the inter-trial interval (2 min), the context and objects were wiped down  
168 with 70% ethanol. Immediately following the third object trial (T3), animals in the experimental  
169 groups were housed in the experimental chamber and were sleep deprived for 5 hr, whereas  
170 controls were housed in the same chamber but allowed to sleep. On day 2, one object was  
171 moved from its original location to an adjacent corner and mice were tested in the context with  
172 the moved object (Test). All trials were 6 min in duration. Object positions were counterbalanced  
173 across trials.

174

## 175 *Behavioral Analysis*

176 All object exploration trials were video recorded using Limelight (Actimetrics, Wilmette,  
177 IL) and analyzed offline by researchers blind to the group condition. All instances when an  
178 animal was oriented toward and touching an object with nose, vibrissae, and/or forelegs were  
179 coded as “object exploration”; contacting an object while passing or oriented away were not  
180 considered. Animals with an average object exploration time less than 10 seconds on any trial  
181 were excluded from analysis. Behavioral data from animals used for sleep analysis was  
182 combined with data from animals used for place cell recordings.

183 Object preference was calculated as the percentage of time spent exploring the moved  
184 object relative to total object exploration time during testing minus the relative time exploring the  
185 same object during training, as previously described (Oliveira et al., 2010). This method  
186 estimated object preference taking into account any potential bias that animals may have had  
187 during training. Specifically, percent change in preference was calculated using the following  
188 formula:

$$189 \quad \% \text{ change in preference} = 100 * \left( \frac{\text{moved object exploration}_{\text{test}}}{\text{total object exploration}_{\text{test}}} - \frac{\text{moved object exploration}_{\text{trial 2-4}}}{\text{total object exploration}_{\text{trial 2-4}}} \right)$$

190 Larger percent change indicates greater preference for the moved object during the test  
191 session, while lower values indicate little change in preference from day 1 to day 2, after the  
192 object is displaced. To rule out that novelty effects recorded on Day 1, we repeated the same  
193 analysis excluding trial 1 when the objects were first introduced, obtaining almost identical  
194 results (Figure 1S).

195

## 196 *Place Cell Recordings and Analysis*

197 Beginning one week after surgery, neural activity was screened daily in an environment  
198 different from the context used for experiments, advancing the electrode bundle 15-20  $\mu\text{m}$  per



199 day until pyramidal cells could be identified by their characteristic firing patterns (Ranck, 1973).  
200 Lowering the electrodes in small steps minimizes electrode drift and ensures recording stability  
201 for several days (Muzzio et al., 2009b; Wang et al., 2012). Moreover, all animals yielding unit  
202 data remained connected to the recoding setup via a commutator throughout the experiment to  
203 further minimize the possibility of electrode drift during the plugging/unplugging. Long-term  
204 recordings were considered stable when cells had the same cluster boundaries over two  
205 sessions (at least 24 hr apart), and the waveforms obtained from all four wires of a tetrode were  
206 identical. Experiments began only when recordings were stable for 24 hr. Animal position and  
207 electrophysiological data were recorded using Cheetah Data Acquisition system (Neuralynx,  
208 Bozeman, MN), as previously described (Wang et al., 2012; Wang et al., 2015).

209 Units were isolated using MClust software (developed by A. David Redish, University of  
210 Minnesota) and accepted for analysis only if they formed isolated clusters with clear Gaussian  
211 ellipses and minimal overlap with surrounding cells and noise. All cells were inspected to rule  
212 out the presence of events during the 2 msec refractory period. Place field maps were  
213 generated using custom Matlab code as previously described (Wang et al., 2012; Keinath et al.,  
214 2014; Wang et al., 2015). Briefly, the arena was first divided into a 70x70 pixel grid and an  
215 activity map (the total number of spikes in each pixel), and a sampling map (the total amount of  
216 time spent in each pixel) were computed. Both maps were then smoothed with a 3 cm standard  
217 deviation Gaussian kernel. The activity map was then divided by the sampling map, which  
218 yielded the place field map. Any location sampled for less than 1 s was considered un-sampled.  
219 Only periods of movement were included in the analysis (minimum walking speed: 2 cm/s).  
220 Cells that fired less than 25 spikes during movement or displayed peak firing frequencies below  
221 1 Hz before smoothing were excluded from analysis. Firing rate patterns were characterized by  
222 computing the overall mean (total number of spikes divided by time spent in the arena), peak  
223 (maximum), and out of field (spikes occurring outside areas defined as place fields) firing rates.  
224 Place fields were defined as any set of at least 9 contiguous pixels in which the average firing

225 rate was at least 20% of the peak firing rate (Rowland et al., 2011). If a cell yielded multiple  
226 place fields, the average of all fields was taken as the place field size. Rate remapping was  
227 calculated as the absolute difference between the peak firing rate of individual cells on  
228 consecutive trials. The spatial information content, a parameter that estimates how well the  
229 firing pattern of a given cell predicts the location of the animal, was computed as previously  
230 described (Skaggs et al., 1993) using the following formula  $IC = -\sum p_i (R_i/R) \log(R_i/R)$ , where  $p_i$  is the  
231 probability of occupying location  $i$ ,  $R_i$  is the firing rate at location  $i$ , and  $R$  is the overall mean  
232 firing rate.

233 Place field stability was assessed by calculating pixel-to-pixel cross-correlations between  
234 maps. The generated Pearson R correlation value reflected the degree of map similarity across  
235 trials for all cells. Overall global remapping was estimated by averaging the Pearson  $r$   
236 correlation values across cells and animals in each condition. Additionally, cell types were  
237 classified into three categories depending on whether they remapped in the presence of the  
238 objects (object cells), remained stable throughout training (context cells), or displayed both  
239 short- and long-term instability (unstable cells), with stability defined as a correlation value  
240 above 0.4, a threshold previously used in mice (Muzzio et al., 2009b; Wang et al., 2012).

241

#### 242 *Verification of electrode placement*

243 Tetrode placements were verified after completion of the experiments by passing a small  
244 current (0.1 mA) for 5 seconds through the tetrodes that yielded data in anesthetized animals.  
245 The brains were removed and fixed in 10% formalin containing 3% potassium ferrocyanide for  
246 24 hr. The tissue was cryosectioned and stained using standard histological procedures  
247 (Powers and Clark, 1955).

248

#### 249 *Sleep State Analysis*

250 EEG/EMG signals were recorded for 10 hours following training on day 1 (Pinnacle  
251 Technology, Lawrence, KS). The headmounts were attached to a preamplifier for first stage  
252 amplification (100x) and initial high-pass filtering (0.5 Hz for EEG and 10 Hz for EMG). All  
253 signals were then sampled at 300 Hz and digitized (Sirenia Acquisition software, Pinnacle  
254 Technology). Animals with excessive noise in any channels (>10% of epochs classified as  
255 artifact) were discarded from analysis (4 animals were excluded from the post-training session  
256 due to noise).

257 Sleep recordings were divided into 4 sec epochs. 5% of epochs were randomly selected  
258 for manual scoring with Sirenia Sleep analysis software using EMG power and EEG amplitude  
259 and frequency to categorize REM, NREM, and WAKE states. Full and scored EEG/EMG files  
260 were then exported to MATLAB and the remaining epochs were analyzed using a naïve  
261 Bayesian classifier, a highly accurate method demonstrated to produce inter-rater agreements  
262 of 92% (Rytönen et al., 2011).

263 To analyze delta and theta power we used the periods of NREM and REM extracted from  
264 the respective Bayesian analysis. The power spectral density (PSD) was estimated using  
265 Welch's method with a window size of 8 sec for delta and 0.4 sec for theta. Total power was  
266 computed from the post-spectral density using trapezoidal numerical integration. Relative power  
267 was then computed as the power in a given frequency band divided by the total power over all  
268 frequencies. Delta frequency: 0.25-4 Hz, theta frequency: 4-10 Hz.

269 Spindle detection during NREM was computed using a validated automated system for rapid  
270 and reliable detection of spindles using mouse EEG. This method eliminates observer bias and  
271 allows quantification of sleep parameters including count, duration, and frequency as well as  
272 rapid quantification during selective sleep segments (code generously provided by Dr. David  
273 Uygun, for analysis details see (Uygun et al., 2019)).

274 *Code accessibility:* All code and analysis tools will be available upon request.

275

276 *Statistics*

277 Statistical analysis was performed with SigmaStat (Ashburn, VA). One way ANOVA was  
278 used to compare object preference during the test session, number and length of sleep bouts as  
279 well as percent time in wake, NREM, and REM. T-tests were used to compare sleep variables  
280 prior to sleep restriction, Two-way ANOVAs with repeated measures were used to compare  
281 place cell correlations across sessions, rate remapping, all parameters to evaluate place cell  
282 characteristics, and differences in spindle count or properties on repeated segments during  
283 sleep. One-way ANOVAs were used to calculate differences in delta and theta relative power  
284 and spindles characteristics (count, duration, and frequency) across groups. Student-Newman  
285 Keuls (SNK) multiple comparisons were used to determine which groups were significantly  
286 different. A significance level of 0.05 was used for all tests.

287  
288 **Results**

289 *Sleep restriction impairs object-place recognition memory in young adult mice but enhances*  
290 *performance in old mice*

291  
292 All animals included in this study were maintained on a 12/12 light/dark (L/D) cycle and  
293 were trained during the first 4 hr of the light cycle. Object preference was assessed following  
294 training and testing in the OPR task (Figure 1A). The results indicated that the groups displayed  
295 differential object/place recognition [effect of group on object preference:  $F_{(3,62)}=4.31$ ,  $p<0.009$ ].  
296 SNKs multiple comparisons demonstrated that young control and old SR mice displayed  
297 significantly greater preference for the moved object ( $p<0.05$ ) in comparison to young SR or old  
298 control mice (Figure 1B). Moreover, object preference in old SR mice was comparable to that  
299 observed in young control animals ( $p>0.05$ ).

300 We also found no significant group or interaction effects on total object exploration times  
301 across trials [main effect of group:  $F_{(3,56)}=0.07$ ,  $p=0.97$ ; interaction:  $[F_{(9,168)}=0.41$ ,  $p=0.93$ , Figure  
302 1C]. However, all groups displayed higher exploration during the first object trial (T1)

303 [F<sub>(3,168)</sub>=15.60, p< 0.001; T1<0.05], which likely resulted as a consequence of the novelty of the  
304 objects (Figure **1C**). Since we observed this difference, we also calculated the object preference  
305 excluding the first object trial to ensure that our results were not biased by a novelty effect. The  
306 results were almost identical to those including all trials (percent change in preference: young  
307 control: 14.30±3.43, young SR: -0.01±4.56, old control: -0.80±5.07, old SR: 19.73±3.51, Figure  
308 1S). These findings demonstrated that the differences in object preference observed across the  
309 groups were not due to variability in object exploration.

310

### 311 *Rate remapping increases during testing in young control and old sleep deprived animals*

312 A subset of animals was implanted with tetrodes in area CA1 to determine the effects of  
313 sleep restriction on hippocampal cell firing (electrode positions are shown in Figure **2A**). We  
314 examined firing rate changes in 110 cells recorded in 10 young mice (60 cells in 6 controls and  
315 50 cells in 4 SR mice) and 79 cells recorded in 10 old mice (42 cells in 5 controls and 37 cells in  
316 5 SR mice). There were no significant effects of group or group by trial interactions in mean,  
317 peak, or out of field firing rate (p>0.05, Figure **2B-D**). However, there was an effect of trial  
318 [mean firing rate: F<sub>(4,739)</sub>=5.57, p<0.001; peak firing rate: F<sub>(4,739)</sub>=3.45, p<0.009; out of field firing  
319 rate: F<sub>(4,739)</sub>=5.42, p<0.001 ]. SNKs post hoc tests indicated that animals displayed higher mean  
320 and out of field firing rates during object trials 1 and 2 and higher peak firing rate in trial 2 than  
321 the habituation and test trials (p<0.05, Figures **2B-D**). However, there were no significant  
322 differences in firing rate across the object trials (p>0.05). These data suggest that the exposure  
323 to the objects increases overall firing rate, but there were no significant differences across the  
324 group conditions throughout training and testing.

325 Hippocampal cells have previously been shown to code environmental changes through  
326 increases or decreases in firing activity, a phenomenon known as rate remapping (Leutgeb et  
327 al., 2005). Therefore, we hypothesized that the analysis of average activity could have masked  
328 potential rate differences. To assess this possibility, we calculated rate remapping as the

329 absolute difference in peak firing rate for each cell across trials. This analysis revealed a trend  
330 in the main effect of group [ $F_{(3,185)}=2.30$ ,  $p=0.08$ ], a significant effect of trial [ $F_{(3,554)}=8.66$ ,  
331  $p<0.001$ ] and a significant group by trial interaction [ $F_{(9,554)}=2.32$ ,  $p<0.02$ ]. SNKs multiple  
332 comparisons indicated that there were significant differences in rate remapping between the last  
333 training trial (T3) and the retrieval trial (Test). Rate remapping was highest in young controls and  
334 old SR animals, the two groups that exhibited successful learning ( $p<0.05$ , Figure 2E). These  
335 results indicate that changes in rate remapping are important for updating object memory  
336 representations in the OPR task.

337

338 *An acute session of sleep restriction increases the spatial information content of hippocampal*  
339 *cells in old mice, but has no effect in young mice*

340 We next examined the spatial information content of the cells, a parameter that  
341 determines how well a cell predicts the location of an animal (Skaggs et al., 1993). We found an  
342 effect of trial and an interaction between trial and group [effect of trial:  $F_{(4,739)}= 6.88$ ,  $p<0.001$ ;  
343 interaction:  $F_{(12, 739)}=2.41$ ,  $p<0.006$ ]. SNKs multiple comparisons showed that cells from old SR  
344 animals displayed more spatial information content than cells from old controls on the Test trial  
345 ( $p<0.02$ ). However, no differences were observed in the young groups ( $p>0.05$ , Figure 3A).  
346 Finally, there were no differences across the groups, trials, or interactions in average field size  
347 or number of fields ( $p>0.05$ , Figure 2S). These results indicate that the spatial properties of  
348 hippocampal cells from old mice improve after an acute session of sleep restriction, while other  
349 parameters remain constant.

350

351 *The overall stability of hippocampal representations decreases during the moved-object test in*  
352 *all groups*

353 Previous studies have shown that dorsal hippocampal cells respond to objects (Cohen et  
354 al., 2013). Therefore, we expected that cells would shift their preferred firing locations (i.e.

355 global remapping) when the objects were first introduced (Hab vs. T1), but display short-term  
356 stability across the training trials while the objects and environment remained unchanged (T1 to  
357 T3). We also anticipated global remapping during the test trial (Test), reflecting that animals  
358 perceived the change in the object configuration or that cells became unstable in the long term,  
359 as previously reported in mice (Muzzio et al., 2009a; Muzzio et al., 2009b). Analysis of similarity  
360 between the place cell maps revealed a significant effect of group [ $F_{(3,185)}=3.77$ ,  $p<0.02$ ], trial  
361 [ $F_{(3,554)}=56.48$ ,  $p<0.001$ ], and interaction [ $F_{(9,554)}=2.58$ ,  $p<0.007$ ]. SNKs multiple comparisons  
362 revealed that old animals (control and SR groups) displayed more remapping than young  
363 animals (control and SR groups), when the objects were first introduced (Hab/T1,  $p<0.05$ ). This  
364 likely reflected the more pronounced instability in spatial representations previously reported in  
365 old animals (Barnes et al., 1997). However, no differences in stability were observed during the  
366 object training trials (T1-3,  $p>0.05$ ). As expected, all groups displayed lower place field stability  
367 during the test trial in comparison to the high short-term stability observed during training  
368 ( $p<0.05$ ), with old control animals showing more instability than all the other groups ( $p<0.05$ ,  
369 Figure **3B**). These data indicated that all groups exhibit some global remapping during the  
370 moved object test trial.

371  
372 *Cell types responding to distinct aspects of the environment are differentially affected by sleep*  
373 *restriction and age*

374 We have previously observed that distinct CA1 neurons display different behavioral  
375 phenotypes during fear learning (Wang et al., 2015). To determine if different subpopulations of  
376 cells were responding to distinct aspects of the environment in the OPR task, cells were  
377 classified according to their remapping patterns during training. “Context” cells displayed high  
378 stability throughout habituation and training; “object” cells remapped when objects were first  
379 introduced but remained stable during all the object training sessions; and “unstable” cells  
380 remapped across all training sessions. In young animals, each of these categories made up

381 roughly 1/3 of the cells recorded (Figure **3C**). However, old animals had a lower percentage of  
382 stable context cells than young mice (Figure **3D**).

383 After cells were classified, we examined remapping within each group across trials  
384 (Figure **4A**). We hypothesized that if animals remembered the environment, context cells should  
385 remain stable during the moved-object test. However, this was not the case in all groups.  
386 Context cells showed an effect of trial [ $F_{(3,159)}=27.55$ ,  $p<0.001$ ], and interaction [ $F_{(9,159)}=2.14$ ,  
387  $p<0.03$ ]. SNKs multiple comparisons indicated that context cells in old control animals were  
388 more unstable than in all the other groups ( $p<0.05$ , Figure **4B**). Interestingly, there was no  
389 difference between young controls and young SR mice in the stability of context cells ( $p>0.05$ ),  
390 suggesting that the memory impairment observed in the latter was not due to a failure recalling  
391 the environment.

392 We also hypothesized that if animals noticed the change in the object configuration,  
393 object cells should display remapping during the test. However, if animals failed to notice the  
394 moved object, these cells should remain stable. Object cells displayed an effect of group  
395 [ $F_{(3,60)}=4.77$ ,  $p<0.006$ ] and trial [ $F_{(3,177)}=120.14$ ,  $p<0.001$ ], as well as an interaction between  
396 these variables [ $F_{(9,177)}=2.26$ ,  $p<0.03$ , Figure **4C**]. SNKs multiple comparisons revealed that  
397 there were no differences in objects cells during training across the groups ( $p>0.05$ ). However,  
398 object cells in young controls and old SR mice displayed significant remapping in comparison to  
399 those in young SR mice during the test trial ( $p<0.05$ ). These results indicate that object cells  
400 respond to the displacement of the object in animals that show proper memory. Object cells  
401 from old controls also remapped during the test trial; however, this likely reflected an overall lack  
402 of long-term stability in this group. Finally, there were no stability differences in “unstable” cells  
403 across groups or trials [group:  $F_{(3,60)}=0.54$ ,  $p>0.05$ ; trial:  $F_{(3,180)}=1.5$ ,  $p>0.05$ ; interaction:  
404 ( $F_{(9,180)}=0.37$ ,  $p>0.05$ ; Figure **4D**]. Together, these data indicate that the proper memory  
405 performance observed in young controls and old SR mice correlates with stable context cells  
406 and flexible object cells.



407

408 *Old control animals display fragmented sleep patterns during post-lar4ning sleep in comparison*  
409 *to young animals*

410 Young and old control animals with EEG/EMG microdrives were placed in a SR chamber  
411 (Figure **5A**), while *ad lib* sleep was recorded and analyzed for 5 hr following training (Figure **5B**).  
412 We found that the total percent time spent in wake, NREM and REM was equivalent in young  
413 and old control animals ( $p>0.05$ , Figure **5C**). However, old animals displayed significantly more  
414 wake [ $t_{(18)}= 2.27$ ,  $p<0.04$ ] and NREM bouts [ $t_{(18)}= 2.59$ ,  $p<0.02$ ] as well as a trend toward more  
415 REM bouts [ $t_{(18)}= 2.00$ ,  $p=0.09$ ] than young controls (Figure **5D**). Additionally, old mice  
416 displayed shorter wake bout length [ $t_{(18)}= 2.28$ ,  $p<0.04$ ] and a trend toward shorter NREM bout  
417 length [ $t_{(18)}= 1.95$ ,  $p=0.067$ ] than young controls (Figure **5E**), indicating that old animals  
418 displayed more fragmented sleep than young mice, as previously observed (Pace-Schott and  
419 Spencer, 2015).

420

421 *Old mice do not exhibit a sleep rebound after restriction, but show increased NREM*  
422 *consolidation*

423 Following the initial 5 hr post-training period, we recorded 5 additional hours of *ad lib*  
424 sleep in the control and SR groups to evaluate the effects of SR on recovery sleep. Old animals  
425 did not display differences in total time spent in wake or sleep states. Moreover, although on  
426 average young SR animals displayed less wake and more NREM than control mice, the  
427 differences were not significant [Figure **5F**, wake:  $F_{(3,35)}= 1.62$ ,  $p=0.08$ , NREM:  $F_{(3,35)}= 1.65$ ,  
428  $p=0.19$ ], REM:  $F_{(3,35)}= 0.78$ ,  $p=0.51$ ]. However, there were significant changes in sleep  
429 macrostructure. We observed differences in the number of NREM bouts [ $F_{(3,35)}= 3.04$ ,  $p<0.05$ ].  
430 SNKs post-hoc tests indicated that the old SR mice had less number of bouts than the young  
431 controls ( $p<0.05$ ), and displayed a trend toward less bouts in comparison to the young SR mice  
432 ( $p=0.07$ ) and the old controls ( $p=0.09$ ) (Figure **5G**). Additionally, there were significant

433 differences in NREM bout length [ $F_{(3,35)}=3.91, p<0.02$ ]. Multiple comparisons indicated that old  
434 SR mice displayed significantly longer NREM bouts compared to old controls ( $p<0.03$ ) and  
435 young SR mice displayed a trend toward longer bouts than young controls ( $p=0.09$ , Figure **5H**).  
436 The fact that old SR mice displayed less number of NREM bouts of longer length than the  
437 controls indicated that NREM was consolidated in this group. Finally, there were no differences  
438 across the groups in bout number or length during wake periods or REM periods ( $p>0.05$ ,  
439 Figure **5G-H**). In summary, these data indicate that an acute session of SR affects sleep  
440 macrostructure in old animals, leading to NREM consolidation.

441  
442 *An acute sleep restriction session increases relative delta power (RDP) during NREM in young*  
443 *mice and relative theta power (RTP) during REM in young mice.*

444 Delta power has been shown to increase following sleep deprivation ((Davis et al.,  
445 2011)). However, this effect depends on the duration of wakefulness (Halassa et al., 2009;  
446 Dispersyn et al., 2017), animal housing conditions (Kaushal et al., 2012), and several other  
447 variables (Davis et al., 2011). To determine if the experimental conditions of this study affected  
448 delta oscillations, we calculated RDP during NREM sleep across the groups. First, we assessed  
449 DRP during *ad lib* sleep following training, but found no significant differences between young  
450 and old control mice [ $t_{(14)}=0.03, p>0.05$ , Figure **6A**]. However, there were differences in RDP  
451 during the recovery period [ $(F_{(3,35)}=4.11, p<0.02)$ ]. SNKs multiple comparisons indicated that the  
452 young SR animals displayed more RDP than the young controls ( $p<0.04$ ); but, there were no  
453 significant differences between the old groups ( $p>0.05$ ; Figure **6B**). These results coincide with  
454 other reports showing increases in delta power in young animals following sleep deprivation  
455 (Halassa et al., 2009).

456 Theta oscillations during REM have also been associated with memory encoding  
457 (Hasselmo, 2006; Hutchison and Rathore, 2015). Therefore, we examined RTP during REM  
458 when this oscillation is most prominent. We did not observe significant differences during the

459 post-learning *ad lib* sleep period [ $t_{(14)}=-1.3$ ,  $p=0.21$ , Figure **6C**], but there were significant  
460 differences during recovery sleep [ $F_{(3,35)}=3.90$ ,  $p<0.02$ ). SNKs multiple comparisons indicated  
461 that young SR mice displayed lower RTP than all the other groups ( $p<0.05$ , Figure **6D**).

462

463 *Young control mice display more spindles of longer length than old control mice immediately*  
464 *following training*

465 Using a validated automated spindle detection method (Uygun et al., 2019), we then  
466 quantified number of spindles, duration, and frequency following training. There were no  
467 significant differences in number, duration, or frequency of spindles between young and old  
468 control mice during the *ad lib* post-training sleep period ( $p>0.05$ , Figures **7A-B** and **4SA**). Since  
469 the initial hours following training have been shown to be important for consolidation in young  
470 animals (Bailey et al., 2004), we divided the post-training sleep period into 1 hr segments to  
471 determine if spindles differ across time. We found that there was a significant effect of segment  
472 and interaction between group and segment [effect of segment:  $F_{(4,48)}=4.67$ ,  $p<0.003$ ;  
473 interaction:  $F_{(4,48)}=2.69$ ,  $p<0.05$ ]. SNKs multiple comparisons indicated that young control mice  
474 displayed more spindles in the first hour post-training (segment 1) in comparison to the old  
475 controls ( $p<0.05$ ), with no significant differences between the groups after that (Figure **7C**).  
476 Similarly, analysis of spindle duration revealed a significant effect of session and interaction  
477 [effect of session:  $F_{(4,48)}=5.81$ ,  $p<0.001$ ; interaction of group and session:  $F_{(4,48)}=2.59$ ,  $p<0.05$ ].  
478 SNKs post hoc tests indicated that young control mice displayed longer spindles during the first  
479 hour post-training in comparison to old control mice ( $p<0.05$ ), but no significant differences after  
480 that (Figure **7D**). There were no differences in spindle frequency between the groups or  
481 interaction between segment and group condition ( $p>0.05$ , Figure 3S). These results indicate  
482 that in young control animals there are more spindles of longer duration immediately following  
483 training, which may contribute to consolidate memories more effectively in this group.

484

485 *An acute session of sleep restriction increases total number of spindles in old animals during*  
486 *recovery*

487 Previous research has indicated that the time window for memory consolidation is much  
488 longer in old animals than young subjects (Schimanski and Barnes, 2010). These findings  
489 suggest that increases in spindle count occurring even several hours following learning may  
490 have a significant impact on memory consolidation in old animals. To address this possibility,  
491 spindle count, duration, and frequency were also examined during the recovery *ad lib* sleep  
492 period. We found that the average number of spindles were different across the groups  
493 [ $F_{(3,35)}=3.86$ ,  $p<0.03$ , Figure **7E**]. SNKs multiple comparisons indicated that Old SR mice  
494 displayed more average number of spindles than old controls ( $p<0.05$ ) and young SR mice  
495 ( $p<0.05$ ) during the recovery period. No differences in spindle duration or frequency were  
496 observed across the groups ( $p>0.05$ ; Figures **7F** and **4SC**).

497 We then examined if there were differences in spindle characteristics across the groups  
498 at different times during recovery by subdividing this period into 1 hr segments. We found a  
499 significant effect of group and segment on spindle count, but no interaction [group:  $F_{(3,116)}=3.73$ ,  
500  $p<0.03$ ; segment:  $F_{(4,116)}=10.72$ ,  $p<0.0001$ , Figure **7G**]. SNKs multiple comparisons indicated  
501 that the old SD group displayed more spindles than the old controls across all segments  
502 ( $p<0.05$ ) and all groups displayed more spindles during the first two hours than during the last  
503 three segments of the recovery ( $p<0.05$ ). There were no significant group, segment or  
504 interaction differences in spindle duration ( $p>0.05$ , Figure **7H**). Together, these results indicate  
505 that during recovery there is an increase in average spindle count in old SR mice in comparison  
506 to old controls, which may serve to consolidate memory and facilitate performance of the task.

507

## 508 **Discussion**

509 In this study, sleep restriction impaired object-place memory in young adult mice, but  
510 unexpectedly enhanced performance in old mice. The improved performance observed in old

511 SR animals was accompanied by decreased NREM fragmentation and increased number of  
512 spindles during recovery sleep. Successful object-place recognition in both young control and  
513 old SR mice correlated with stability of the cells that coded the context and remapping of the  
514 cells that coded the configuration of the objects. Moreover, while both old control and young SR  
515 mice failed to recognize the displaced object, they exhibited different patterns of stability during  
516 the test session, indicating that performance deficits in these groups stemmed from distinct  
517 memory impairments. These data indicated that age-related cognitive deficiencies could be  
518 rescued by improving sleep architecture, which improves the flexibility and stability of  
519 hippocampal representations.

520         The unexpected finding that OPR memory was enhanced in old SR mice suggests that  
521 SR followed by a prolonged period of recovery sleep has mnemonic advantages. Sleep  
522 fragmentation has been associated with impaired memory consolidation (Tartar et al., 2006;  
523 Ward et al., 2009a; Ward et al., 2009b; Sportiche et al., 2010); thus, it is likely that NREM  
524 consolidation underlies the rescue of age-related cognitive deficits. Indeed, several studies have  
525 found that enhancing NREM sleep via pharmacological interventions or sleep restriction can  
526 provide protective effects on cognitive impairment following stroke or traumatic brain injury  
527 (Martinez-Vargas et al., 2012; Cam et al., 2013; Morawska et al., 2016). Further, changes in  
528 NREM activity predict memory performance (Ognjanovski et al., 2014; Ognjanovski et al., 2017)  
529 and disruptions of hippocampal oscillations during NREM sleep disrupt memory consolidation  
530 (Ognjanovski et al., 2018). Together, our findings and these data indicate that NREM is  
531 important for memory consolidation and enhancing its quality improves cognitive processes.

532         It is important to note that in our study, place cell instability in young control and old SR  
533 animals originated from object and unstable cells, while context cells remained highly stable  
534 even in the long term. Recent findings in mice found that hippocampal cells expressing *cfos*, a  
535 marker of activity that has been associated with the formation of memory engrams (Liu et al.,  
536 2014), are much more unstable than cells that do not express this early gene (Tanaka et al.,

537 2018), confirming that subsets of cells participating in memory processes are indeed unstable.  
538 Moreover, it was shown that unstable subpopulations coexist with stable ones, potentially  
539 having distinct mnemonic functions. These observations are in line with our finding that the  
540 instability of “object” cells is important for memory updating.

541 Previous studies examining place cell activity during the OPR task, or variations of this  
542 task, have been conducted in young adult rats under normal sleep conditions (Zheng et al.,  
543 2016). For example, Larkin et al. showed that CA1 neurons exhibited changes in firing rate, but  
544 not in the cells’ preferred firing locations during the moved object test (Larkin et al., 2014).  
545 Similarly, we observed rate remapping between the last object exploration trial and the test  
546 session in young control and old SR mice, suggesting that rate changes in both rats and mice  
547 are associated with object-place recognition. However, we also found that successful learning  
548 correlated with place field remapping in a subset of CA1 neurons during the moved-object test.  
549 The differences in stability between our observations and Larkin et al. may be related to the  
550 intrinsic stability differences between mice and rats (Kentros et al., 2004; Muzzio et al., 2009b),  
551 or to the different retention intervals used in these studies (5 min in Larkin et al. compared to  
552  $\geq 15$  hr in our study).

553 The general consensus from other studies using the OPR task in young animals is that  
554 immediate post-training sleep is critical for memory. For example, performance was reported to  
555 be optimal when the retention interval occurred during the inactive phase of the light/dark cycle  
556 and rats were permitted to sleep (Binder et al., 2012). Furthermore, post-training SR has  
557 consistently shown to impair object-location memory in young adult mice (Havekes et al., 2014;  
558 Prince et al., 2014). Although these behavioral deficits have been attributed to disrupted  
559 memory consolidation, our results suggested otherwise. The long-term stability of “context” cells  
560 in young SR mice indicated that spatial representations formed during training were retrieved  
561 correctly, whereas the stability of “object” cells suggested that these animals failed to recognize  
562 the change in the object configuration. Therefore, while contextual memories remained intact,

563 SR prevented recognition of specific changes in the environment. The synaptic homeostasis  
564 hypothesis proposed by Tononi and colleagues posits that rather than actively strengthening  
565 memories, sleep may instead serve to downscale synapses in order to allow further memory  
566 acquisition (Tononi and Cirelli, 2006). Moreover, Poe and collaborators demonstrated that this  
567 process occurs when cells fire at the trough of the theta cycle during REM (Poe et al., 2000),  
568 which leads to depotentiation of synapses (Pavlidis et al., 1988; Huerta and Lisman, 1995).  
569 Interestingly, we observed that young SR animals displayed less relative theta power during  
570 REM, a deficit that might have limited the ability of these animals to update object/place  
571 representations.

572 Similarly to a previous study showing age-related impairments in OPR (Wimmer et al.,  
573 2012), we observed performance deficits in old control mice. However, we demonstrated that  
574 these performance deficits were different from those found in young SR mice. In old mice,  
575 “context” cells showed long-term instability, remapping between the training and test session,  
576 whereas young SD mice display stable representations of context. Reduced spatial stability has  
577 been reported in old animals (Barnes et al., 1997), along with impairments in several spatial  
578 tasks (Rosenzweig and Barnes, 2003). Therefore, it is possible that the sleep fragmentation  
579 observed in old control mice contributes to impair consolidation of the static aspects that  
580 conform an environment.

581 The observation that SR has a positive effect in old animals suggests that as long as  
582 animals are able to consolidate NREM during the first 10 hr after training, memories can be  
583 properly stored. These results suggest that the time window for memory consolidation may be  
584 different in young and old animals. It is well established that in young animals, the initial hours  
585 after training are critical for initiating transcriptional events that lead to the translation of new  
586 proteins important for memory encoding (Bailey et al., 2004). In agreement with this, we do  
587 observe more spindles, which are important for consolidation, during the initial hour post-training  
588 in young animals. However, converging lines of evidence indicate that the time window for

589 protein-synthesis dependent memory consolidation is extended in old animals (Schimanski and  
590 Barnes, 2010). Moreover, while sleep restriction inhibits translational processes in young mice,  
591 it does not affect protein synthesis in old animals (Naidoo et al., 2008). Together, these  
592 observations suggest that NREM consolidation and increased spindle numbers during sleep  
593 recovery may have beneficial effects in old mice because these changes occur when the  
594 window for memory consolidation is still open. One interesting future line of inquiry would be to  
595 conduct sleep restriction 5 hr after training. We predict that this manipulation may not affect  
596 young animals but will significantly impact old mice in which prolonged time windows are  
597 necessary for consolidation.

598 Finally, spindles have been associated with memory encoding (Ulrich, 2016; Antony et  
599 al., 2019) and alterations in spindle count and properties are good predictors of age-related  
600 cognitive decline (Taillard et al., 2019). Our data support these findings since young controls  
601 display higher spindle counts of longer length than old controls during the first hour post-  
602 training. However, we also show that increases in spindle count during sleep recovery are  
603 sufficient to enhance OPR memory, demonstrating that manipulations that improve sleep  
604 architecture even 5 hr after learning can ameliorate memory deficits. In summary, our findings  
605 contribute to a better understanding of the effects of sleep quality on memory and hippocampal  
606 representations, and have potential clinical implications for rescuing age-related cognitive  
607 deficits.

608

609



610 **Figure Captions**

611 **Figure 1.** Timeline and performance in the OPR task. A) Schematic of behavioral design. B)  
612 Percent change in preference for displaced object for all groups. C) Object exploration times  
613 during training and testing. Young control (n=16), young SR (n=15), old control (n=13), old SR  
614 (n=15). Histograms represent mean  $\pm$  standard error of the mean (SEM).

615  
616 **Figure 2.** Schematic of electrode placements and changes in firing rate during the OPR task. A.  
617 Schematic of electrode placements and microphotograph showing example of lesion marking  
618 electrode placement in CA1. B-D) Mean (B), peak (C), and out of field (D) firing rate for all  
619 groups across trials. There were no differences on average measures of firing rate across the  
620 groups throughout training. However, average firing rates during the initial object exposures (T1  
621 and T2) were higher than average firing rates during habituation and test trials ( $p < 0.05$ ) for all  
622 groups. No differences were observed across training trials ( $p > 0.05$ ). E) Rate remapping -  
623 absolute differences in peak firing rate across trials - was calculated for all groups during  
624 training and testing. Results indicated that young controls and old SR mice displayed higher rate  
625 remapping in comparison to young SR and old control groups during the test trial. Histograms  
626 represent mean  $\pm$  SEM.

627  
628 **Figure 3.** Spatial information content, global remapping across sessions, and percentage of  
629 different cell types across groups during performance in the OPR task. A) The spatial  
630 information content of cells from old SR animals increased during testing in comparison to cells  
631 from old control mice ( $p < 0.05$ ). However, there were no significant differences between old SR,  
632 young control and young SR mice ( $p > 0.05$ ). B) Average global remapping for all groups across  
633 trials. Old animals displayed significant more instability than young mice between the  
634 habituation and trail 1 ( $p < 0.05$ ). During testing, old control mice displayed more instability that  
635 all the other groups ( $p < 0.05$ ). C-D) Percentage of context, object, and unstable cells recorded in  
636 young (C) and old (D) mice. Young controls (n=6 mice, 60 cells), young SR (n=4 mice, 50 cells),  
637 old control (n=5 mice, 42 cells), old SR (n=5 mice, 37 cells). Histograms represent mean  $\pm$   
638 SEM.

639  
640 **Figure 4.** Cell-type remapping across sessions during performance in the OPR task. A)  
641 schematic indicating how trial correlations were computed. B-D) Average global remapping of  
642 context (B), object (C), and unstable (D) cells across trials (left) and corresponding examples of  
643 color coded place cell rate maps (right). Note that context cells are only unstable in the old  
644 control group, whereas object cells are unstable in all groups except the young SR animals.  
645 Waveforms shown recorded on day 1 and 2 show high similarity, indicating recording stability  
646 during the 24 hr period of training and testing. Number on top of each map represents peak  
647 firing frequency used to normalize the data. Context cells: Young controls (n=23 cells), young  
648 SR (n=20 cells), old control (n=9 cells), old SR (n=8 cells). Object cells: Young control (15 cells),  
649 young SR (13 cells), old control (15 cells), old SR (16 cells). Unstable cells: Young control (22  
650 cells), young SR (17 cells), old control (18 cells), old SR (13 cells). Histograms represent mean  
651  $\pm$  SEM.

652  
653 **Figure 5.** Sleep patterns during post-training and recovery sleep periods in young and old mice.  
654 A.) Photograph of the sleep restriction chamber. B) Examples of EEG/EMG activity during  
655 WAKE, NREM, and REM. C-E) Percentage of total time (C), number of bouts (D), and bout  
656 length (E) in Wake, NREM, and REM during post-training sleep in young and old control mice.  
657 F-H) Percent total time (F), number of bouts (G), and bout length (H) in Wake, NREM and REM  
658 during recovery sleep in control and SR groups. Young control (n=11), young SR (n=10), old  
659 control (n=8), old SR (n=10). Histograms represent mean  $\pm$  SEM.

660

661 **Figure 6.** Relative delta power (RDP) during NREM and relative theta power (RTP) during  
662 REM. A-B. RDP during post-training (A) and recovery sleep (B). Although there were no  
663 significant differences in RDP between young and old controls during the post-training sleep  
664 period (A), RDP increases in young SR mice during recovery sleep (B). Band range: low: 0.25-4  
665 Hz. C-D. RTP during post-training (C) and recovery sleep (D). There were no differences  
666 between young and old control mice in RTP during the post-training period. However, RTP was  
667 significantly reduced in young SR mice in comparison to young controls ( $p < 0.05$ ). Histograms  
668 represent mean  $\pm$  SEM.

669  
670 **Figure 7.** Spindle characteristics. A-B. Average spindle count (A) and duration (B) during the  
671 post-training period. No differences were found between the groups. C-D. Spindle  
672 characteristics during 1 hr segments of post-training sleep. Young control mice displayed more  
673 spindles (C) of longer duration (D) than old controls during the first hour post-training. E-F.  
674 Average spindle count (E) and duration (F) during the recovery period. Old SR mice displayed  
675 more average number of spindles than old controls ( $p > 0.05$ ). F. No differences were observed  
676 in spindle duration. G-H. Spindle characteristics during 1 hr segments of recovery sleep. G. Old  
677 SD mice displayed more spindles than old controls across all segments ( $p < 0.05$ ). Additionally,  
678 all groups displayed more spindles during the first two hours of recovery sleep in comparison to  
679 the last 3 segments ( $p < 0.05$ ). H. No significant differences in spindle duration were observed  
680 across the groups during the 1 hr recovery segments. Histograms represent mean  $\pm$  SEM.  
681

682 **References**

- 683 Abel T, Havekes R, Saletin JM, Walker MP (2013) Sleep, plasticity and memory from molecules  
684 to whole-brain networks. *Curr Biol* 23:R774-788.
- 685 Altena E, Ramautar JR, Van Der Werf YD, Van Someren EJ (2010) Do sleep complaints  
686 contribute to age-related cognitive decline? *Prog Brain Res* 185:181-205.
- 687 Antony JW, Schonauer M, Staresina BP, Cairney SA (2019) Sleep Spindles and Memory  
688 Reprocessing. *Trends Neurosci* 42:1-3.
- 689 Bailey CH, Kandel ER, Si K (2004) The persistence of long-term memory: a molecular approach  
690 to self-sustaining changes in learning-induced synaptic growth. *Neuron* 44:49-57.
- 691 Barnes CA, Suster MS, Shen J, McNaughton BL (1997) Multistability of cognitive maps in the  
692 hippocampus of old rats. *Nature* 388:272-275.
- 693 Binder S, Baier PC, Molle M, Inostroza M, Born J, Marshall L (2012) Sleep enhances memory  
694 consolidation in the hippocampus-dependent object-place recognition task in rats.  
695 *Neurobiol Learn Mem* 97:213-219.
- 696 Cam E, Gao B, Imbach L, Hodor A, Bassetti CL (2013) Sleep deprivation before stroke is  
697 neuroprotective: a pre-ischemic conditioning related to sleep rebound. *Exp Neurol*  
698 247:673-679.
- 699 Cohen SJ, Munchow AH, Rios LM, Zhang G, Asgeirsdottir HN, Stackman RW, Jr. (2013) The  
700 rodent hippocampus is essential for nonspatial object memory. *Curr Biol* 23:1685-1690.
- 701 Davis CJ, Clinton JM, Jewett KA, Zielinski MR, Krueger JM (2011) Delta wave power: an  
702 independent sleep phenotype or epiphenomenon? *J Clin Sleep Med* 7:S16-18.
- 703 de Bruin EJ, van Run C, Staaks J, Meijer AM (2017) Effects of sleep manipulation on cognitive  
704 functioning of adolescents: A systematic review. *Sleep Med Rev* 32:45-57.
- 705 de Lavilleon G, Lacroix MM, Rondi-Reig L, Benchenane K (2015) Explicit memory creation  
706 during sleep demonstrates a causal role of place cells in navigation. *Nat Neurosci*  
707 18:493-495.
- 708 Dispersyn G, Sauvet F, Gomez-Merino D, Ciret S, Drogou C, Leger D, Gallopin T, Chennaoui M  
709 (2017) The homeostatic and circadian sleep recovery responses after total sleep  
710 deprivation in mice. *J Sleep Res* 26:531-538.
- 711 Drieu C, Todorova R, Zugaro M (2018) Nested sequences of hippocampal assemblies during  
712 behavior support subsequent sleep replay. *Science* 362:675-679.
- 713 Espiritu JR (2008) Aging-related sleep changes. *Clin Geriatr Med* 24:1-14, v.
- 714 Gais S, Born J (2004a) Declarative memory consolidation: mechanisms acting during human  
715 sleep. *Learn Mem* 11:679-685.
- 716 Gais S, Born J (2004b) Low acetylcholine during slow-wave sleep is critical for declarative  
717 memory consolidation. *Proc Natl Acad Sci U S A* 101:2140-2144.
- 718 Gais S, Lucas B, Born J (2006) Sleep after learning aids memory recall. *Learn Mem* 13:259-  
719 262.
- 720 Graves LA, Heller EA, Pack AI, Abel T (2003) Sleep deprivation selectively impairs memory  
721 consolidation for contextual fear conditioning. *Learn Mem* 10:168-176.
- 722 Halassa MM, Florian C, Fellin T, Munoz JR, Lee SY, Abel T, Haydon PG, Frank MG (2009)  
723 Astrocytic modulation of sleep homeostasis and cognitive consequences of sleep loss.  
724 *Neuron* 61:213-219.
- 725 Hasan S, Dauvilliers Y, Mongrain V, Franken P, Tafti M (2012) Age-related changes in sleep in  
726 inbred mice are genotype dependent. *Neurobiol Aging* 33:195 e113-126.
- 727 Hasselmo ME (2006) The role of acetylcholine in learning and memory. *Curr Opin Neurobiol*  
728 16:710-715.
- 729 Havekes R, Bruinenberg VM, Tudor JC, Ferri SL, Baumann A, Meerlo P, Abel T (2014)  
730 Transiently increasing cAMP levels selectively in hippocampal excitatory neurons during  
731 sleep deprivation prevents memory deficits caused by sleep loss. *J Neurosci* 34:15715-  
732 15721.

- 733 Huang YL, Liu RY, Wang QS, Van Someren EJ, Xu H, Zhou JN (2002) Age-associated  
734 difference in circadian sleep-wake and rest-activity rhythms. *Physiol Behav* 76:597-603.
- 735 Huerta PT, Lisman JE (1995) Bidirectional synaptic plasticity induced by a single burst during  
736 cholinergic theta oscillation in CA1 in vitro. *Neuron* 15:1053-1063.
- 737 Hutchison IC, Rathore S (2015) The role of REM sleep theta activity in emotional memory. *Front*  
738 *Psychol* 6:1439.
- 739 Hwaun E, Colgin LL (2019) CA3 place cells that represent a novel waking experience are  
740 preferentially reactivated during sharp wave-ripples in subsequent sleep. *Hippocampus*.
- 741 Kaushal N, Nair D, Gozal D, Ramesh V (2012) Socially isolated mice exhibit a blunted  
742 homeostatic sleep response to acute sleep deprivation compared to socially paired mice.  
743 *Brain Res* 1454:65-79.
- 744 Keinath AT, Wang ME, Wann EG, Yuan RK, Dudman JT, Muzzio IA (2014) Precise spatial  
745 coding is preserved along the longitudinal hippocampal axis. *Hippocampus* 24:1533-  
746 1548.
- 747 Kentros CG, Agnihotri NT, Streater S, Hawkins RD, Kandel ER (2004) Increased attention to  
748 spatial context increases both place field stability and spatial memory. *Neuron* 42:283-  
749 295.
- 750 Krause AJ, Simon EB, Mander BA, Greer SM, Saletin JM, Goldstein-Piekarski AN, Walker MP  
751 (2017) The sleep-deprived human brain. *Nat Rev Neurosci* 18:404-418.
- 752 Larkin MC, Lykken C, Tye LD, Wickelgren JG, Frank LM (2014) Hippocampal output area CA1  
753 broadcasts a generalized novelty signal during an object-place recognition task.  
754 *Hippocampus* 24:773-783.
- 755 Lee AK, Wilson MA (2002) Memory of sequential experience in the hippocampus during slow  
756 wave sleep. *Neuron* 36:1183-1194.
- 757 Lester AW, Moffat SD, Wiener JM, Barnes CA, Wolbers T (2017) The Aging Navigational  
758 System. *Neuron* 95:1019-1035.
- 759 Leutgeb S, Leutgeb JK, Barnes CA, Moser EI, McNaughton BL, Moser MB (2005) Independent  
760 codes for spatial and episodic memory in hippocampal neuronal ensembles. *Science*  
761 309:619-623.
- 762 Lister JP, Barnes CA (2009) Neurobiological changes in the hippocampus during normative  
763 aging. *Arch Neurol* 66:829-833.
- 764 Liu X, Ramirez S, Redondo RL, Tonegawa S (2014) Identification and Manipulation of Memory  
765 Engram Cells. *Cold Spring Harb Symp Quant Biol* 79:59-65.
- 766 Martinez-Vargas M, Estrada Rojo F, Tabla-Ramon E, Navarro-Arguelles H, Ortiz-Lailzon N,  
767 Hernandez-Chavez A, Solis B, Martinez Tapia R, Perez Arredondo A, Morales-Gomez J,  
768 Gonzalez-Rivera R, Nava-Talavera K, Navarro L (2012) Sleep deprivation has a  
769 neuroprotective role in a traumatic brain injury of the rat. *Neurosci Lett* 529:118-122.
- 770 Miller DB, O'Callaghan JP (2005) Aging, stress and the hippocampus. *Ageing Res Rev* 4:123-  
771 140.
- 772 Mizumori SJ (2006) Hippocampal place fields: a neural code for episodic memory?  
773 *Hippocampus* 16:685-690.
- 774 Morawska MM, Buchele F, Moreira CG, Imbach LL, Noain D, Baumann CR (2016) Sleep  
775 Modulation Alleviates Axonal Damage and Cognitive Decline after Rodent Traumatic  
776 Brain Injury. *J Neurosci* 36:3422-3429.
- 777 Muzzio IA, Kentros C, Kandel E (2009a) What is remembered? Role of attention on the  
778 encoding and retrieval of hippocampal representations. *J Physiol* 587:2837-2854.
- 779 Muzzio IA, Levita L, Kulkarni J, Monaco J, Kentros C, Stead M, Abbott LF, Kandel ER (2009b)  
780 Attention enhances the retrieval and stability of visuospatial and olfactory  
781 representations in the dorsal hippocampus. *PLoS Biol* 7:e1000140.

- 782 Naidoo N, Ferber M, Master M, Zhu Y, Pack AI (2008) Aging impairs the unfolded protein  
783 response to sleep deprivation and leads to proapoptotic signaling. *J Neurosci* 28:6539-  
784 6548.
- 785 O'Keefe J, Dostrovsky J (1971) The hippocampus as a spatial map. Preliminary evidence from  
786 unit activity in the freely-moving rat. *Brain Res* 34:171-175.
- 787 Ognjanovski N, Broussard C, Zochowski M, Aton SJ (2018) Hippocampal Network Oscillations  
788 Rescue Memory Consolidation Deficits Caused by Sleep Loss. *Cereb Cortex* 28:3711-  
789 3723.
- 790 Ognjanovski N, Maruyama D, Lashner N, Zochowski M, Aton SJ (2014) CA1 hippocampal  
791 network activity changes during sleep-dependent memory consolidation. *Front Syst*  
792 *Neurosci* 8:61.
- 793 Ognjanovski N, Schaeffer S, Wu J, Mofakham S, Maruyama D, Zochowski M, Aton SJ (2017)  
794 Parvalbumin-expressing interneurons coordinate hippocampal network dynamics  
795 required for memory consolidation. *Nat Commun* 8:15039.
- 796 Ohayon MM, Carskadon MA, Guilleminault C, Vitiello MV (2004) Meta-analysis of quantitative  
797 sleep parameters from childhood to old age in healthy individuals: developing normative  
798 sleep values across the human lifespan. *Sleep* 27:1255-1273.
- 799 Oliveira AM, Hawk JD, Abel T, Havekes R (2010) Post-training reversible inactivation of the  
800 hippocampus enhances novel object recognition memory. *Learn Mem* 17:155-160.
- 801 Pace-Schott EF, Spencer RM (2015) Sleep-dependent memory consolidation in healthy aging  
802 and mild cognitive impairment. *Curr Top Behav Neurosci* 25:307-330.
- 803 Pavlides C, Greenstein YJ, Grudman M, Winson J (1988) Long-term potentiation in the dentate  
804 gyrus is induced preferentially on the positive phase of theta-rhythm. *Brain Res* 439:383-  
805 387.
- 806 Poe GR (2017) Sleep Is for Forgetting. *J Neurosci* 37:464-473.
- 807 Poe GR, Nitz DA, McNaughton BL, Barnes CA (2000) Experience-dependent phase-reversal of  
808 hippocampal neuron firing during REM sleep. *Brain Res* 855:176-180.
- 809 Powers MM, Clark G (1955) An evaluation of cresyl echt violet acetate as a Nissl stain. *Stain*  
810 *Technol* 30:83-88.
- 811 Prince TM, Wimmer M, Choi J, Havekes R, Aton S, Abel T (2014) Sleep deprivation during a  
812 specific 3-hour time window post-training impairs hippocampal synaptic plasticity and  
813 memory. *Neurobiol Learn Mem* 109:122-130.
- 814 Ranck JB, Jr. (1973) Studies on single neurons in dorsal hippocampal formation and septum in  
815 unrestrained rats. I. Behavioral correlates and firing repertoires. *Exp Neurol* 41:461-531.
- 816 Rasch B, Born J (2013) About sleep's role in memory. *Physiol Rev* 93:681-766.
- 817 Rosenzweig ES, Barnes CA (2003) Impact of aging on hippocampal function: plasticity, network  
818 dynamics, and cognition. *Prog Neurobiol* 69:143-179.
- 819 Rowland DC, Yanovich Y, Kentros CG (2011) A stable hippocampal representation of a space  
820 requires its direct experience. *Proc Natl Acad Sci U S A* 108:14654-14658.
- 821 Rytkonen KM, Zitting J, Porkka-Heiskanen T (2011) Automated sleep scoring in rats and mice  
822 using the naive Bayes classifier. *J Neurosci Methods* 202:60-64.
- 823 Saletin JM, Goldstein-Piekarski AN, Greer SM, Stark S, Stark CE, Walker MP (2016) Human  
824 Hippocampal Structure: A Novel Biomarker Predicting Mnemonic Vulnerability to, and  
825 Recovery from, Sleep Deprivation. *J Neurosci* 36:2355-2363.
- 826 Schimanski LA, Barnes CA (2010) Neural Protein Synthesis during Aging: Effects on Plasticity  
827 and Memory. *Front Aging Neurosci* 2.
- 828 Skaggs W, McNaughton B, Gothard K, Markus E (1993) An information-theoretic approach to  
829 deciphering the hippocampal code. In: *Advances in Neural Information Processing*  
830 (Hanson S, Cowan J, Giles C, eds), pp 1030-1037. San Mateo, CA: Morgan Kaufmann.
- 831 Smith C (2001) Sleep states and memory processes in humans: procedural versus declarative  
832 memory systems. *Sleep Med Rev* 5:491-506.



- 833 Smith C, Rose GM (1996) Evidence for a paradoxical sleep window for place learning in the  
834 Morris water maze. *Physiol Behav* 59:93-97.
- 835 Smith DM, Mizumori SJ (2006) Hippocampal place cells, context, and episodic memory.  
836 *Hippocampus* 16:716-729.
- 837 Sportiche N, Suntsova N, Methippara M, Bashir T, Mitrani B, Szymusiak R, McGinty D (2010)  
838 Sustained sleep fragmentation results in delayed changes in hippocampal-dependent  
839 cognitive function associated with reduced dentate gyrus neurogenesis. *Neuroscience*  
840 170:247-258.
- 841 Squire LR, Zola SM (1998) Episodic memory, semantic memory, and amnesia. *Hippocampus*  
842 8:205-211.
- 843 Stickgold R, Walker MP (2013) Sleep-dependent memory triage: evolving generalization  
844 through selective processing. *Nat Neurosci* 16:139-145.
- 845 Taillard J, Sagaspe P, Berthomier C, Brandewinder M, Amieva H, Dartigues JF, Rainfray M,  
846 Harston S, Micoulaud-Franchi JA, Philip P (2019) Non-REM Sleep Characteristics  
847 Predict Early Cognitive Impairment in an Aging Population. *Front Neurol* 10:197.
- 848 Tanaka KZ, He H, Tomar A, Niisato K, Huang AJY, McHugh TJ (2018) The hippocampal  
849 engram maps experience but not place. *Science* 361:392-397.
- 850 Tartar JL, Ward CP, McKenna JT, Thakkar M, Arrigoni E, McCarley RW, Brown RE, Strecker  
851 RE (2006) Hippocampal synaptic plasticity and spatial learning are impaired in a rat  
852 model of sleep fragmentation. *Eur J Neurosci* 23:2739-2748.
- 853 Tononi G, Cirelli C (2006) Sleep function and synaptic homeostasis. *Sleep Med Rev* 10:49-62.
- 854 Tononi G, Cirelli C (2014) Sleep and the price of plasticity: from synaptic and cellular  
855 homeostasis to memory consolidation and integration. *Neuron* 81:12-34.
- 856 Ulrich D (2016) Sleep Spindles as Facilitators of Memory Formation and Learning. *Neural Plast*  
857 2016:1796715.
- 858 Uygun DS, Katsuki F, Bolortuya Y, Aguilar DD, McKenna JT, Thankachan S, McCarley RW,  
859 Basheer R, Brown RE, Strecker RE, McNally JM (2019) Validation of an automated  
860 sleep spindle detection method for mouse electroencephalography. *Sleep* 42.
- 861 Wang ME, Yuan RK, Keinath AT, Ramos Alvarez MM, Muzzio IA (2015) Extinction of Learned  
862 Fear Induces Hippocampal Place Cell Remapping. *J Neurosci* 35:9122-9136.
- 863 Wang ME, Wann EG, Yuan RK, Ramos Alvarez MM, Stead SM, Muzzio IA (2012) Long-term  
864 stabilization of place cell remapping produced by a fearful experience. *J Neurosci*  
865 32:15802-15814.
- 866 Ward CP, McCarley RW, Strecker RE (2009a) Experimental sleep fragmentation impairs spatial  
867 reference but not working memory in Fischer/Brown Norway rats. *J Sleep Res* 18:238-  
868 244.
- 869 Ward CP, McCoy JG, McKenna JT, Connolly NP, McCarley RW, Strecker RE (2009b) Spatial  
870 learning and memory deficits following exposure to 24 h of sleep fragmentation or  
871 intermittent hypoxia in a rat model of obstructive sleep apnea. *Brain Res* 1294:128-137.
- 872 Wennberg AM, Canham SL, Smith MT, Spira AP (2013) Optimizing sleep in older adults:  
873 treating insomnia. *Maturitas* 76:247-252.
- 874 Wilson M, Permito R, English A, Albritton S, Coogle C, Van Dongen HPA (2019) Performance  
875 and sleepiness in nurses working 12-h day shifts or night shifts in a community hospital.  
876 *Accid Anal Prev* 126:43-46.
- 877 Wimmer ME, Hernandez PJ, Blackwell J, Abel T (2012) Aging impairs hippocampus-dependent  
878 long-term memory for object location in mice. *Neurobiol Aging* 33:2220-2224.
- 879 Zheng C, Bieri KW, Hwaun E, Colgin LL (2016) Fast Gamma Rhythms in the Hippocampus  
880 Promote Encoding of Novel Object-Place Pairings. *eNeuro* 3.
- 881

**A**

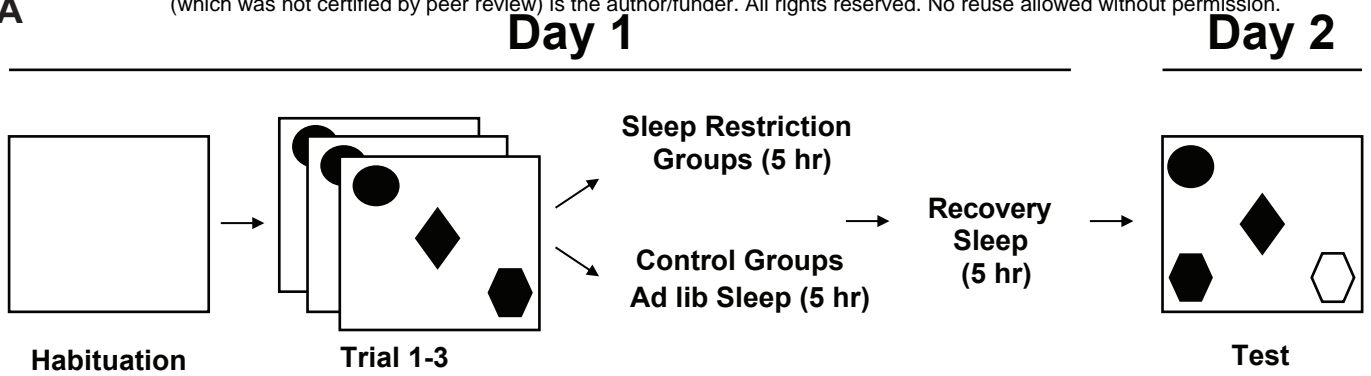

**B**

**Preference for Displaced Object**

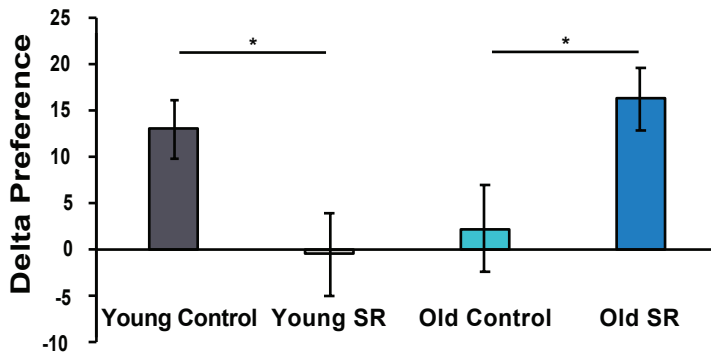

**C**

**Object Exploration**

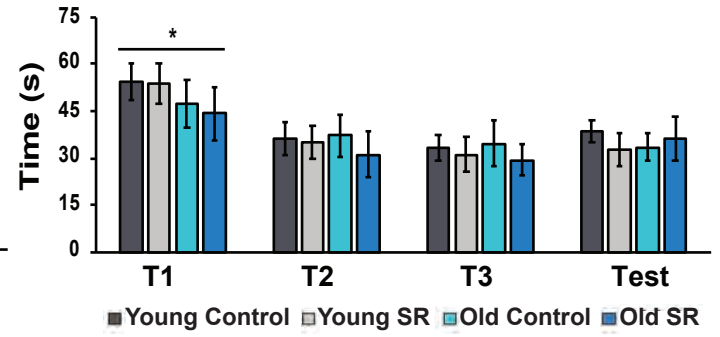

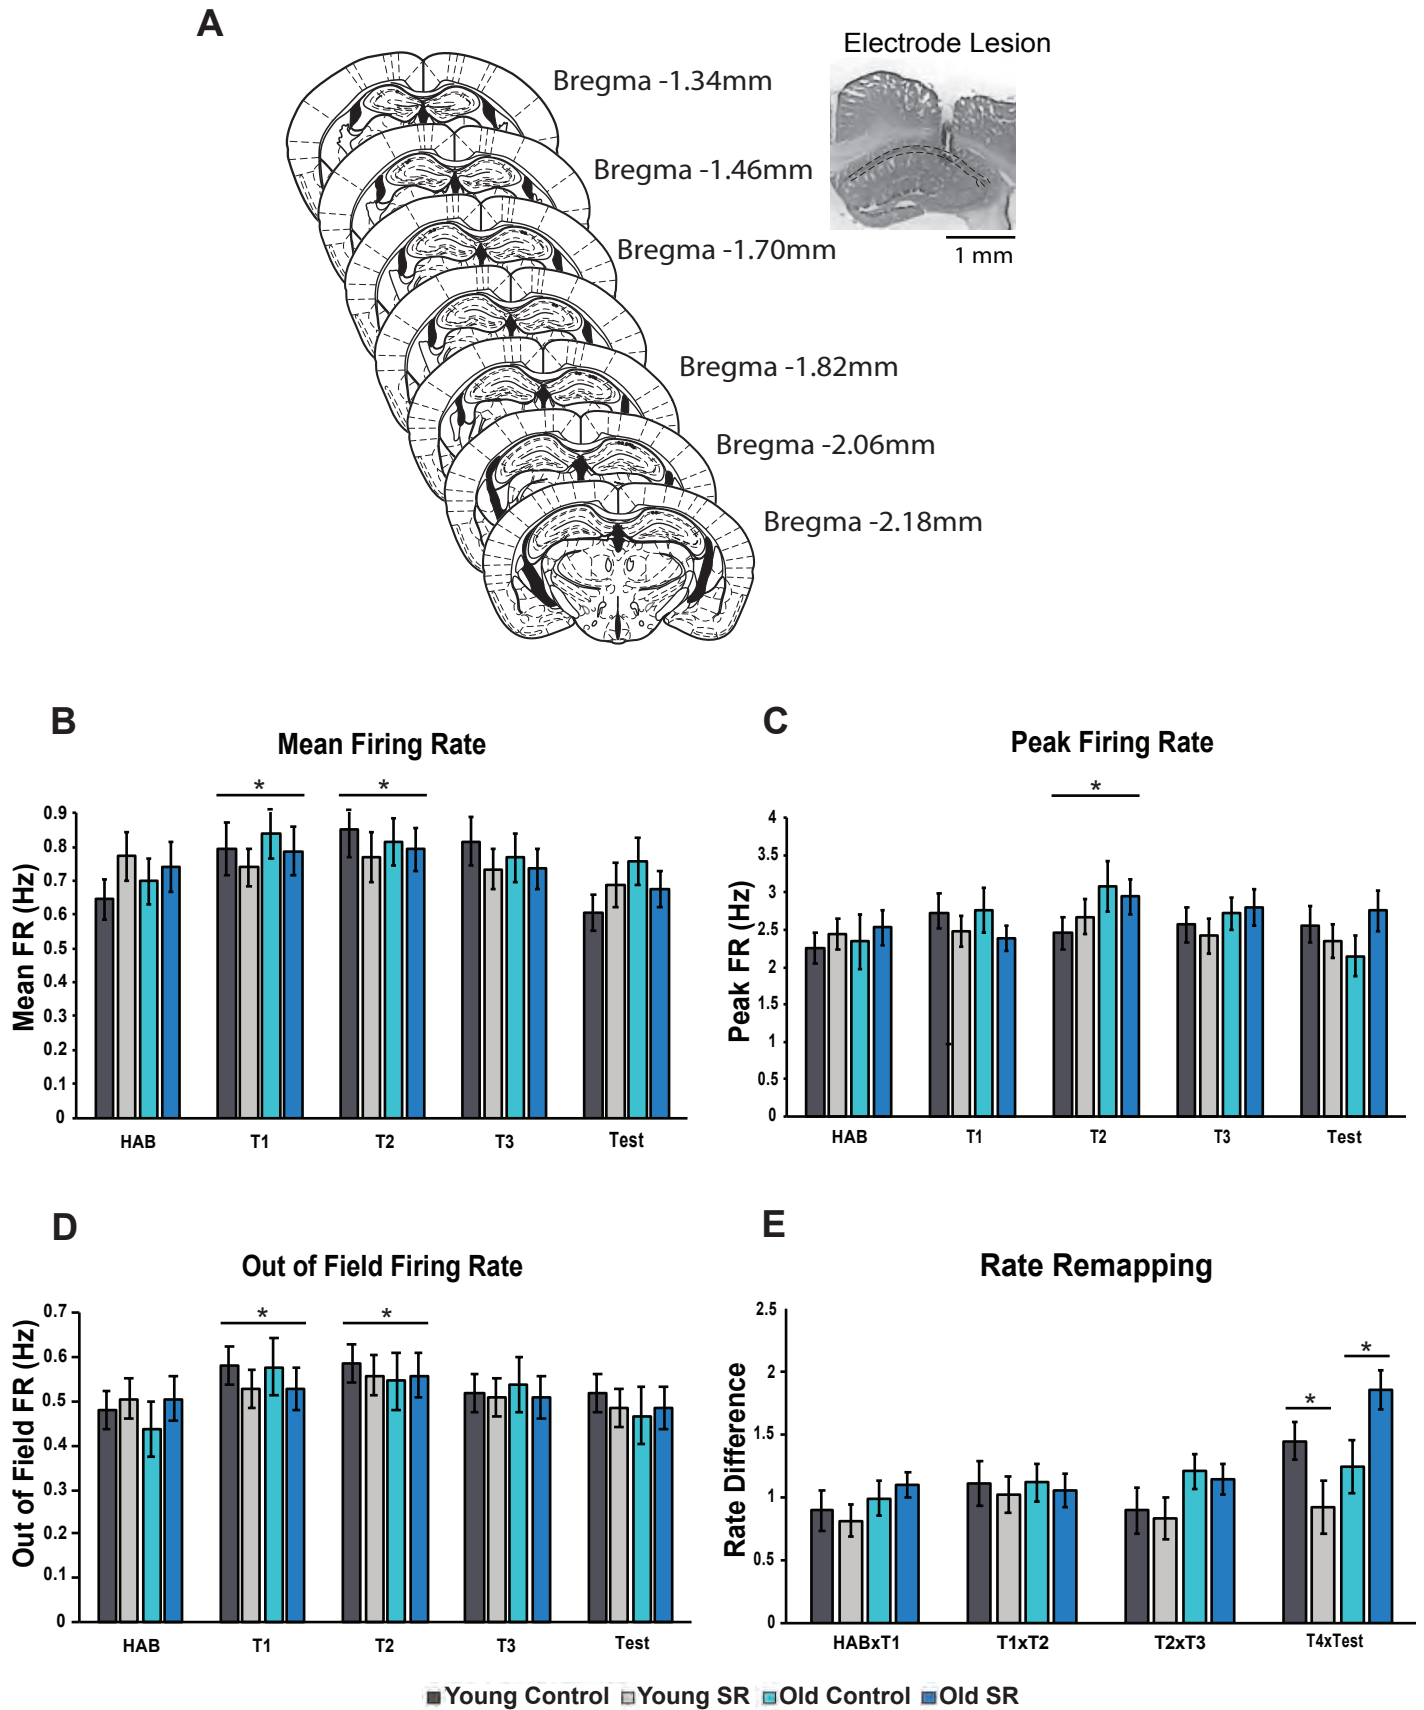

Figure 2



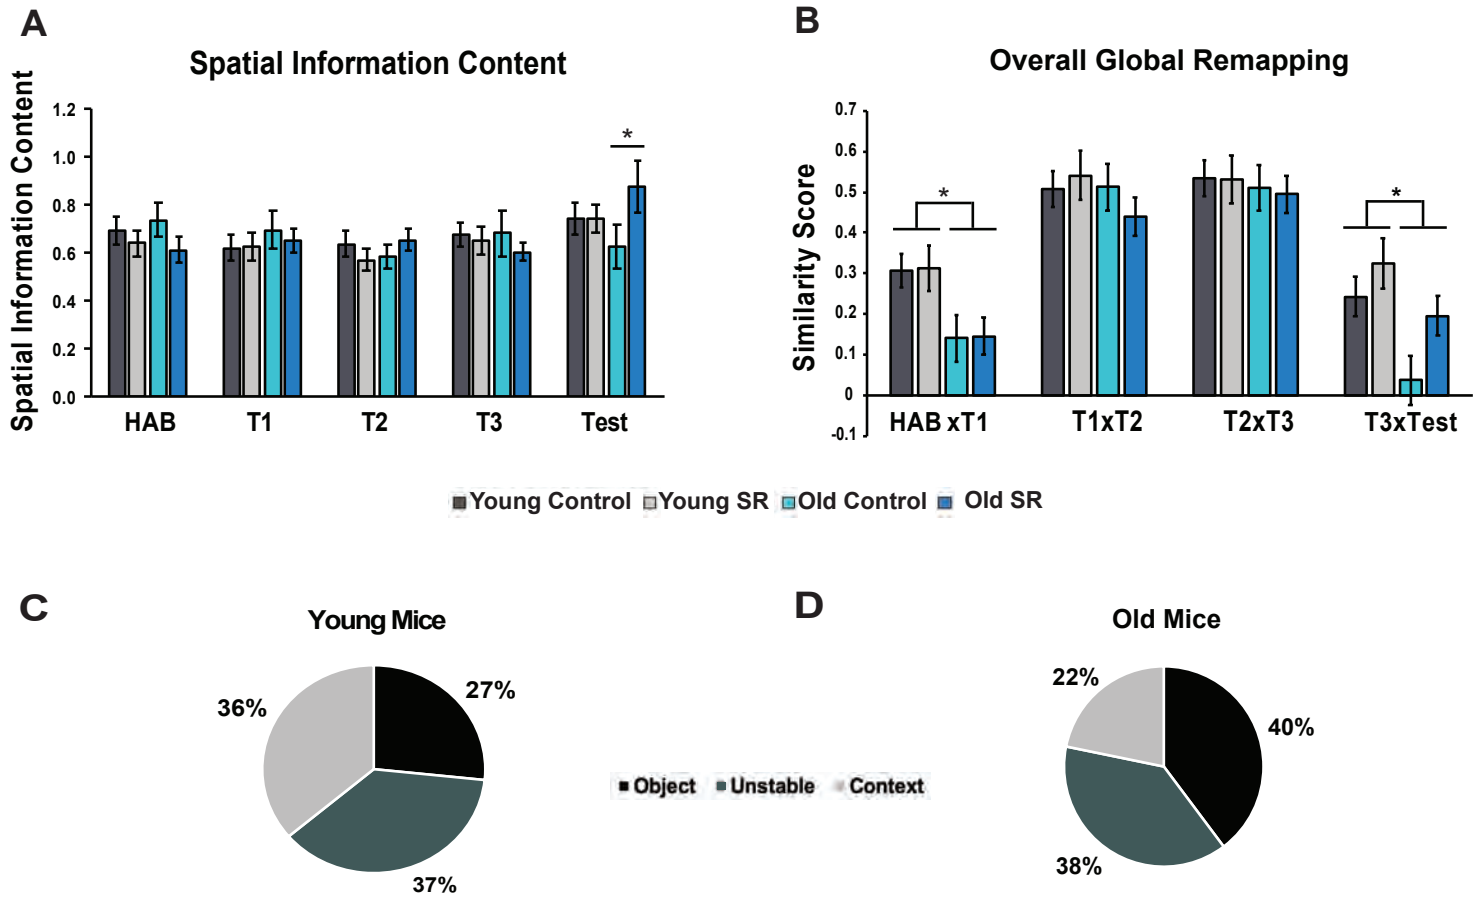

Figure 3

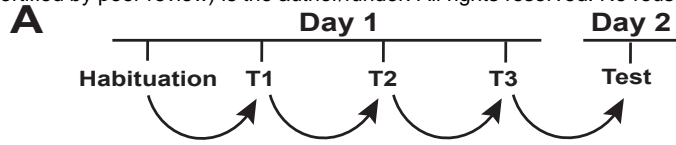

**B**

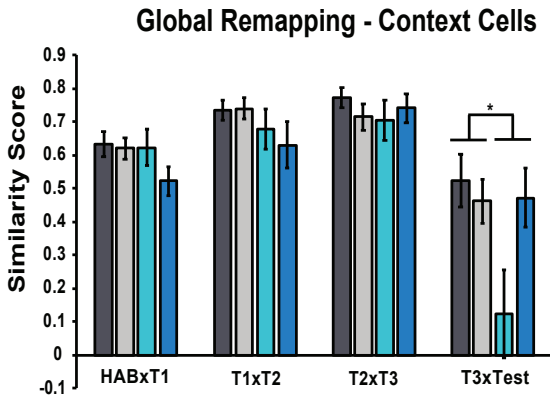

**Context Cells**

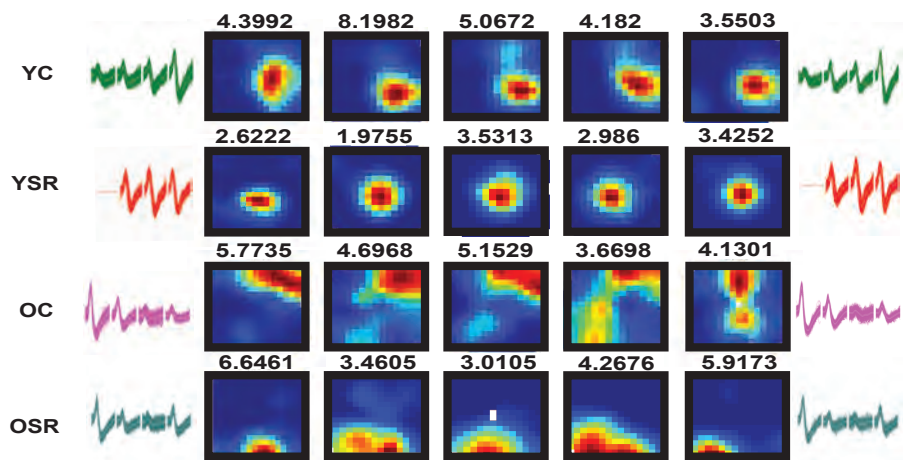

**C**

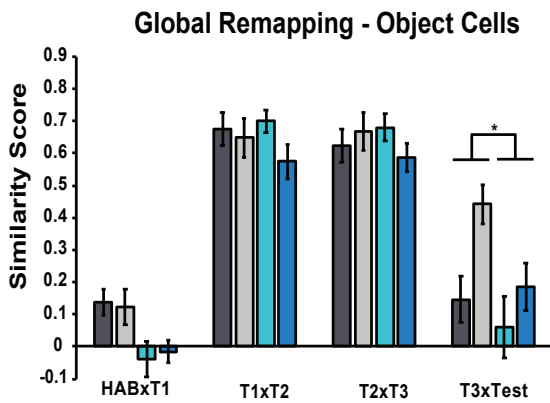

**Object Cells**

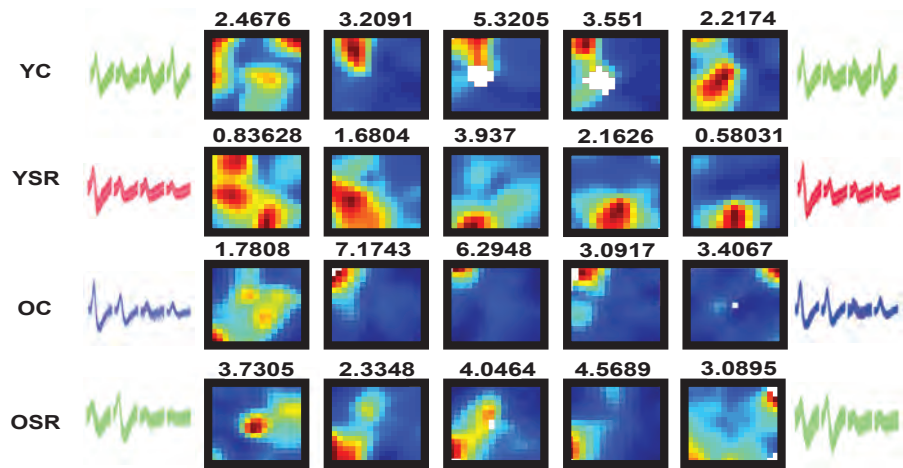

**D**

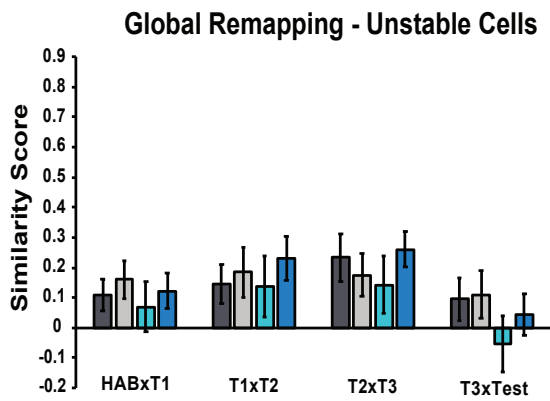

**Unstable Cells**

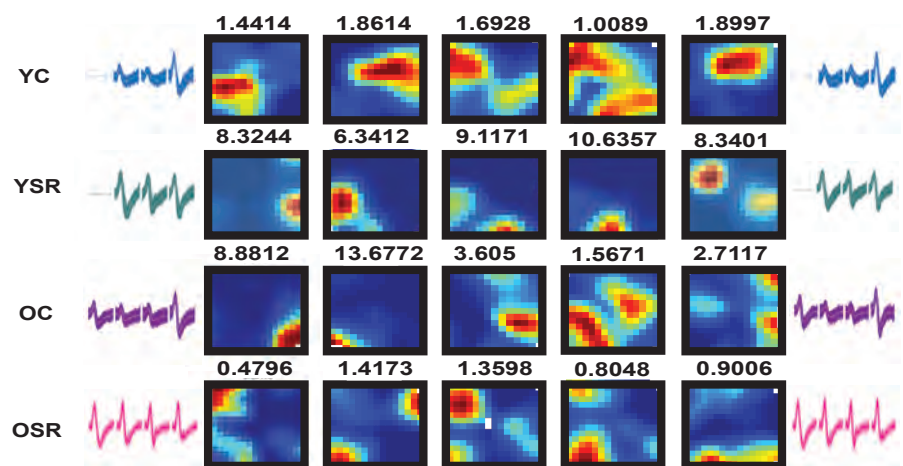

■ Young Control    ■ Young SR    ■ Old Control    ■ Old SR

Figure 4

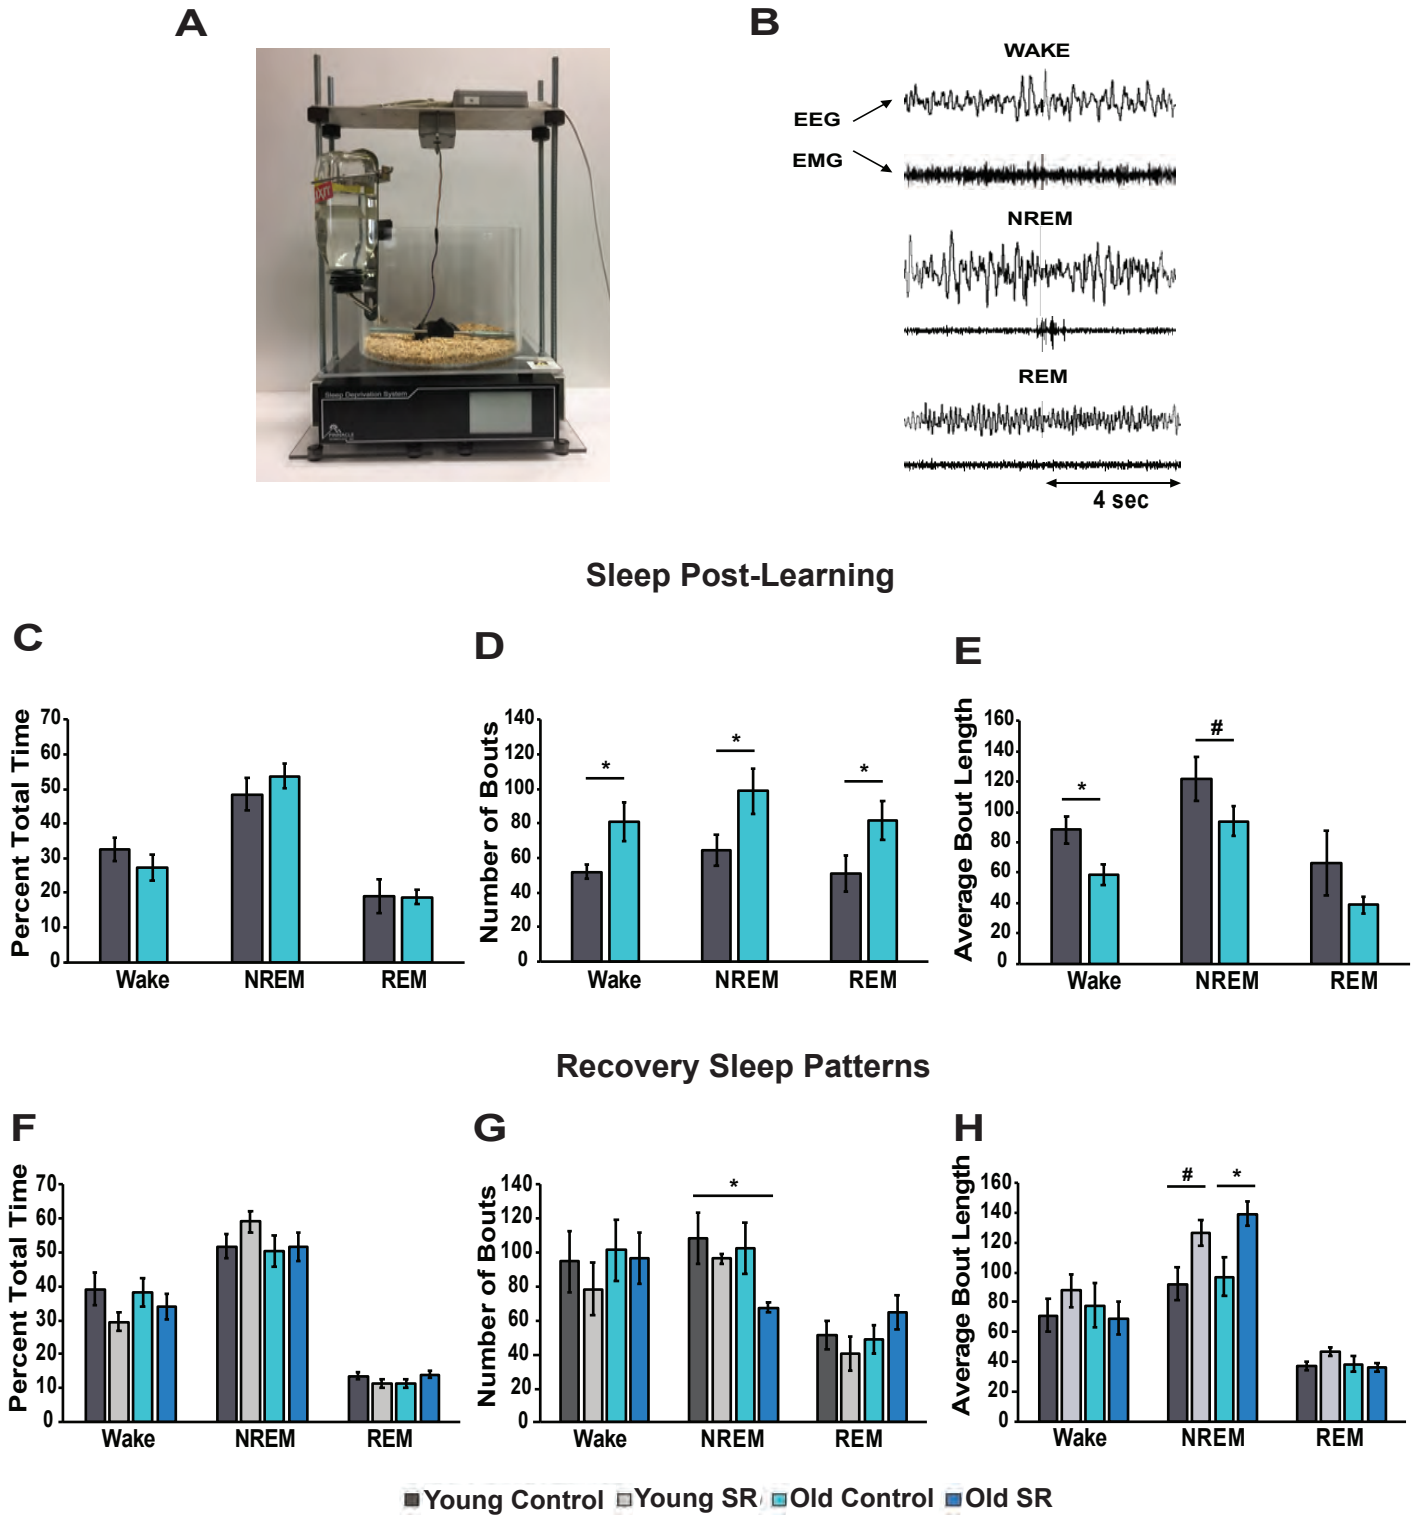

Figure 5

**A** Post Learning Relative Delta Power During NREM Sleep

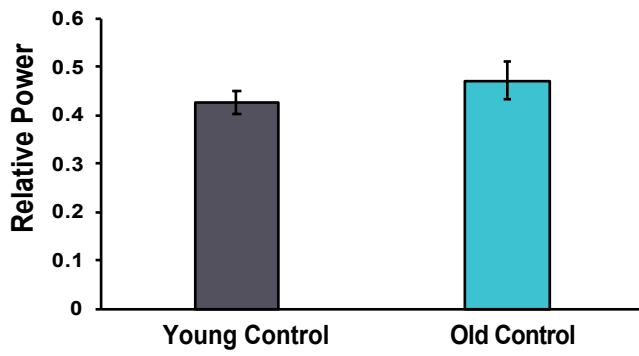

**B** Recovery Sleep Relative Delta Power During NREM Sleep

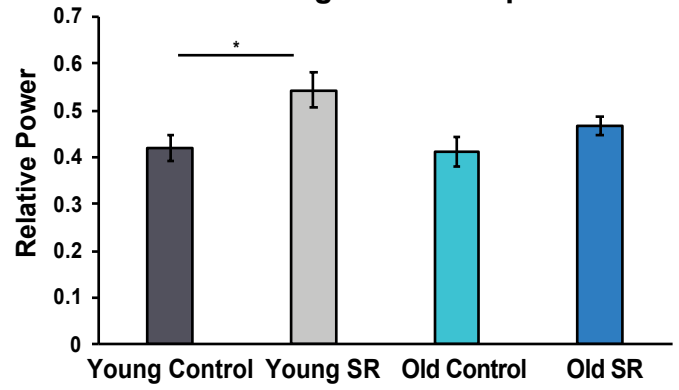

**C** Post Learning Relative Theta Power During REM Sleep

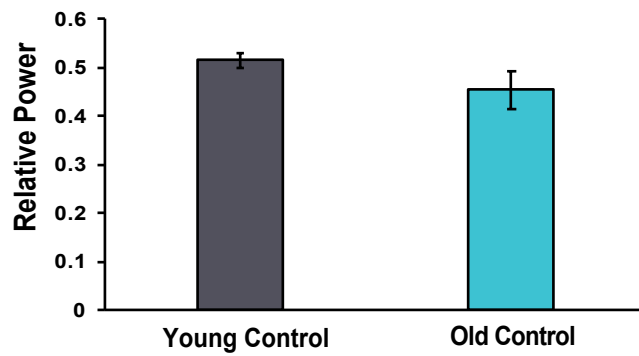

**D** Recovery Sleep Relative Theta Power During REM Sleep

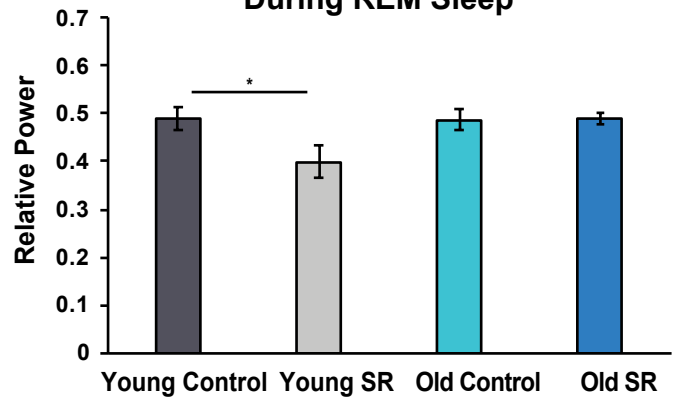

## Post-Learning Sleep

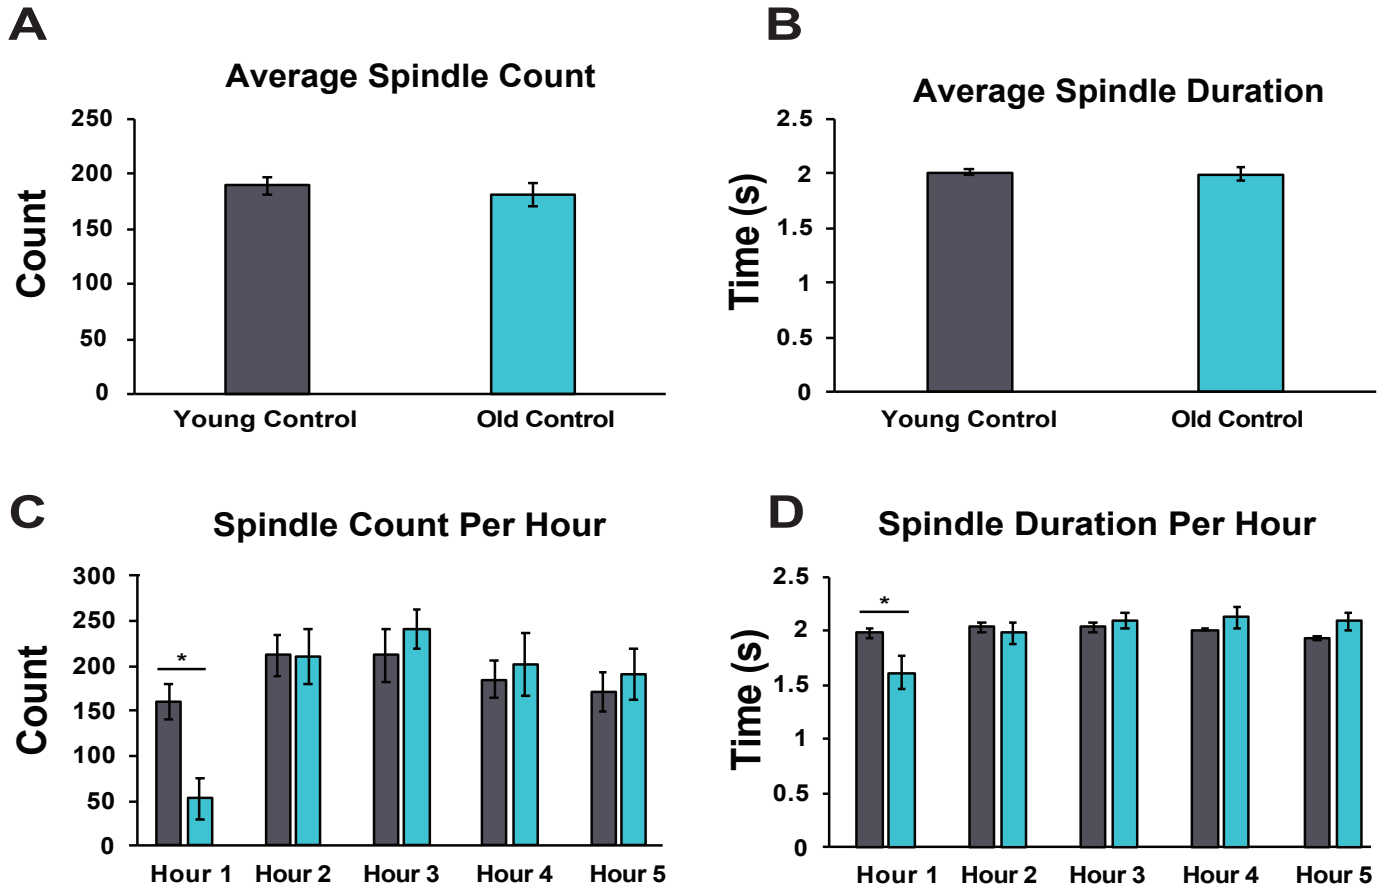

## Recovery Sleep

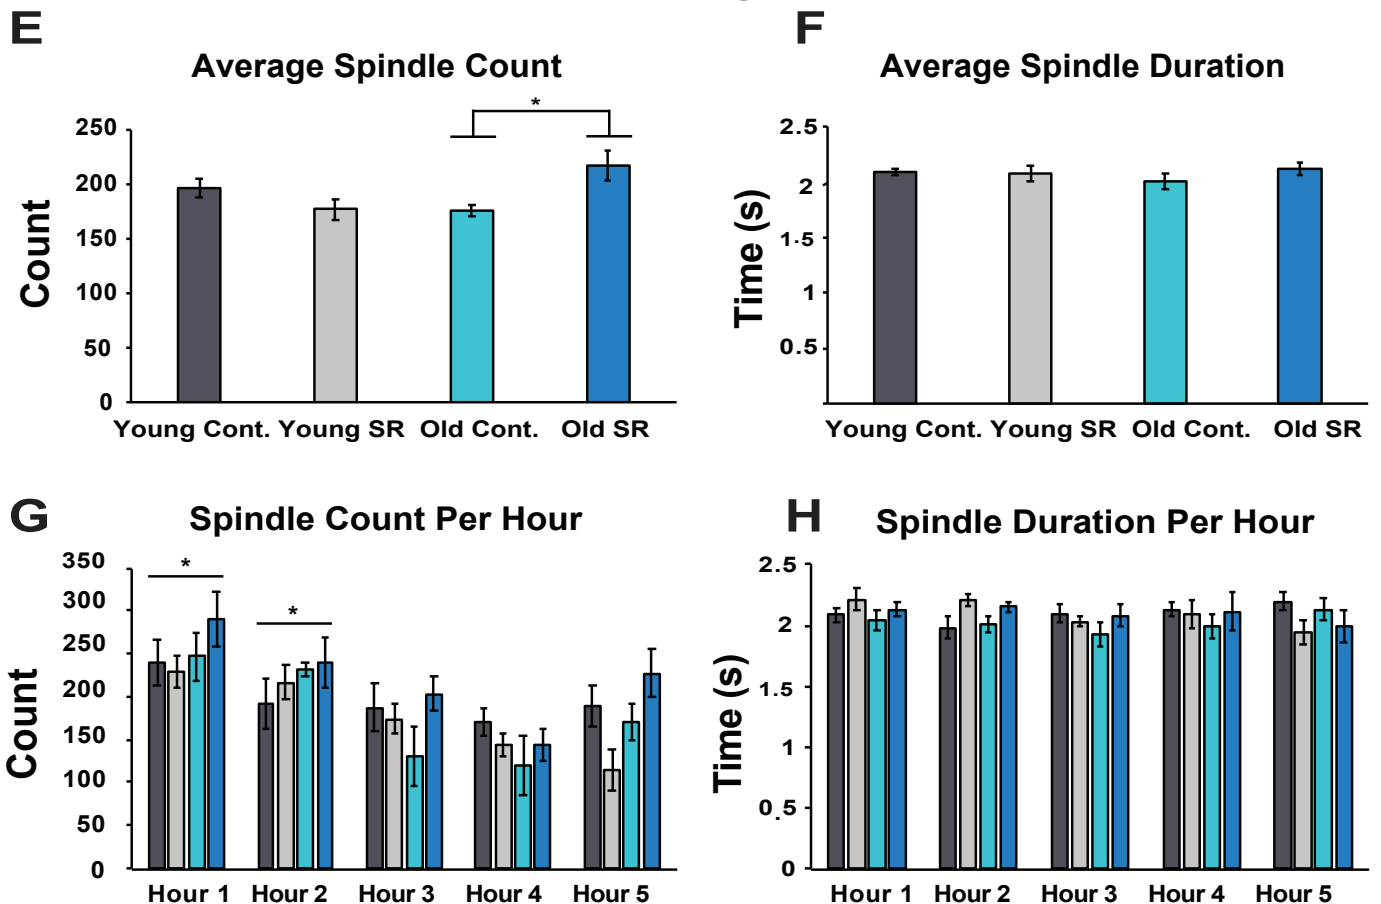

Figure 7
